# Supplementary material
Source: publisher figshare collection journal article supplement (https://gsajournals.figshare.com/ndownloader/files/28864896)
Supplement: Supplementary file 1 [file 28864896]

## Sheet: Table S8
Table S8: Genes included in the 14 clusters.
	cluster
augustus_masked-tulip_contig_247_pilon_pilon-processed-gene-2.179-mRNA-1	9
augustus_masked-tulip_contig_247_pilon_pilon-processed-gene-2.142-mRNA-1	9
maker-tulip_contig_394_pilon_pilon-augustus-gene-0.19-mRNA-1	9
maker-tulip_contig_662_pilon_pilon-augustus-gene-0.15-mRNA-1	9
maker-tulip_contig_862_pilon_pilon-augustus-gene-1.60-mRNA-1	9
augustus_masked-tulip_contig_44_pilon_pilon-processed-gene-0.11-mRNA-1	9
augustus_masked-tulip_contig_603_pilon_pilon-processed-gene-4.50-mRNA-1	9
maker-tulip_contig_583_pilon_pilon-augustus-gene-0.5-mRNA-1	9
augustus_masked-tulip_contig_209_pilon_pilon-processed-gene-3.4-mRNA-1	9
augustus_masked-tulip_contig_451_pilon_pilon-processed-gene-0.4-mRNA-1	9
maker-tulip_contig_527_pilon_pilon-augustus-gene-3.9-mRNA-1	9
augustus_masked-tulip_contig_247_pilon_pilon-processed-gene-2.177-mRNA-1	9
augustus_masked-tulip_contig_441_pilon_pilon-processed-gene-4.14-mRNA-1	9
augustus_masked-tulip_contig_673_pilon_pilon-processed-gene-1.6-mRNA-1	9
augustus_masked-tulip_contig_149_pilon_pilon-processed-gene-0.34-mRNA-1	9
maker-tulip_contig_334_pilon_pilon-augustus-gene-4.58-mRNA-1	9
maker-tulip_contig_316_pilon_pilon-augustus-gene-3.45-mRNA-1	9
maker-tulip_contig_867_pilon_pilon-augustus-gene-3.60-mRNA-1	9
maker-tulip_contig_318_pilon_pilon-augustus-gene-0.3-mRNA-1	9
augustus_masked-tulip_contig_662_pilon_pilon-processed-gene-2.4-mRNA-1	9
augustus_masked-tulip_contig_653_pilon_pilon-processed-gene-0.159-mRNA-1	9
maker-tulip_contig_843_pilon_pilon-augustus-gene-6.21-mRNA-1	9
augustus_masked-tulip_contig_503_pilon_pilon-processed-gene-1.56-mRNA-1	9
augustus_masked-tulip_contig_270_pilon_pilon-processed-gene-0.31-mRNA-1	9
maker-tulip_contig_287_pilon_pilon-augustus-gene-1.132-mRNA-1	9
augustus_masked-tulip_contig_174_pilon_pilon-processed-gene-0.12-mRNA-1	9
augustus_masked-tulip_contig_316_pilon_pilon-processed-gene-3.11-mRNA-1	9
augustus_masked-tulip_contig_781_pilon_pilon-processed-gene-1.3-mRNA-1	9
maker-tulip_contig_78_pilon_pilon-augustus-gene-0.55-mRNA-1	9
maker-tulip_contig_356_pilon_pilon-augustus-gene-1.49-mRNA-1	9
maker-tulip_contig_704_pilon_pilon-augustus-gene-2.26-mRNA-1	9
augustus_masked-tulip_contig_659_pilon_pilon-processed-gene-1.15-mRNA-1	9
augustus_masked-tulip_contig_690_pilon_pilon-processed-gene-5.15-mRNA-1	9
augustus_masked-tulip_contig_333_pilon_pilon-processed-gene-2.4-mRNA-1	9
maker-tulip_contig_2_pilon_pilon-augustus-gene-5.41-mRNA-1	9
augustus_masked-tulip_contig_66_pilon_pilon-processed-gene-2.43-mRNA-1	9
maker-tulip_contig_81_pilon_pilon-augustus-gene-5.15-mRNA-1	9
augustus_masked-tulip_contig_362_pilon_pilon-processed-gene-3.11-mRNA-1	9
augustus_masked-tulip_contig_44_pilon_pilon-processed-gene-5.23-mRNA-1	9
maker-tulip_contig_610_pilon_pilon-augustus-gene-2.11-mRNA-1	9
maker-tulip_contig_320_pilon_pilon-augustus-gene-3.32-mRNA-1	9
maker-tulip_contig_173_pilon_pilon-augustus-gene-0.26-mRNA-1	9
augustus_masked-tulip_contig_781_pilon_pilon-processed-gene-5.47-mRNA-1	9
maker-tulip_contig_673_pilon_pilon-augustus-gene-0.87-mRNA-1	9
maker-tulip_contig_673_pilon_pilon-augustus-gene-0.88-mRNA-1	9
augustus_masked-tulip_contig_441_pilon_pilon-processed-gene-4.8-mRNA-1	7
maker-tulip_contig_381_pilon_pilon-augustus-gene-0.107-mRNA-1	7
maker-tulip_contig_657_pilon_pilon-augustus-gene-0.3-mRNA-1	7
maker-tulip_contig_477_pilon_pilon-augustus-gene-0.50-mRNA-1	7
maker-tulip_contig_479_pilon_pilon-augustus-gene-1.25-mRNA-1	7
augustus_masked-tulip_contig_429_pilon_pilon-processed-gene-3.22-mRNA-1	7
maker-tulip_contig_483_pilon_pilon-augustus-gene-0.9-mRNA-1	7
maker-tulip_contig_505_pilon_pilon-augustus-gene-0.14-mRNA-1	7
augustus_masked-tulip_contig_505_pilon_pilon-processed-gene-0.37-mRNA-1	7
maker-tulip_contig_586_pilon_pilon-augustus-gene-4.8-mRNA-1	7
augustus_masked-tulip_contig_623_pilon_pilon-processed-gene-0.6-mRNA-1	7
augustus_masked-tulip_contig_784_pilon_pilon-processed-gene-0.32-mRNA-1	7
maker-tulip_contig_741_pilon_pilon-augustus-gene-0.18-mRNA-1	7
augustus_masked-tulip_contig_450_pilon_pilon-processed-gene-1.16-mRNA-1	7
augustus_masked-tulip_contig_316_pilon_pilon-processed-gene-3.10-mRNA-1	7
augustus_masked-tulip_contig_783_pilon_pilon-processed-gene-0.21-mRNA-1	7
augustus_masked-tulip_contig_247_pilon_pilon-processed-gene-2.141-mRNA-1	7
maker-tulip_contig_399_pilon_pilon-augustus-gene-0.12-mRNA-1	7
maker-tulip_contig_872_pilon_pilon-augustus-gene-0.79-mRNA-1	7
maker-tulip_contig_441_pilon_pilon-augustus-gene-4.27-mRNA-1	7
augustus_masked-tulip_contig_638_pilon_pilon-processed-gene-0.35-mRNA-1	7
augustus_masked-tulip_contig_190_pilon_pilon-processed-gene-1.10-mRNA-1	7
maker-tulip_contig_80_pilon_pilon-augustus-gene-0.80-mRNA-1	7
augustus_masked-tulip_contig_31_pilon_pilon-processed-gene-0.32-mRNA-1	7
augustus_masked-tulip_contig_148_pilon_pilon-processed-gene-0.53-mRNA-1	7
maker-tulip_contig_547_pilon_pilon-augustus-gene-6.77-mRNA-1	7
maker-tulip_contig_132_pilon_pilon-augustus-gene-1.68-mRNA-1	7
maker-tulip_contig_636_pilon_pilon-augustus-gene-0.16-mRNA-1	7
maker-tulip_contig_707_pilon_pilon-augustus-gene-0.30-mRNA-1	7
augustus_masked-tulip_contig_522_pilon_pilon-processed-gene-0.5-mRNA-1	7
maker-tulip_contig_633_pilon_pilon-augustus-gene-0.80-mRNA-1	7
maker-tulip_contig_112_pilon_pilon-augustus-gene-2.3-mRNA-1	7
maker-tulip_contig_560_pilon_pilon-augustus-gene-0.43-mRNA-1	7
augustus_masked-tulip_contig_784_pilon_pilon-processed-gene-0.34-mRNA-1	7
augustus_masked-tulip_contig_161_pilon_pilon-processed-gene-0.13-mRNA-1	7
maker-tulip_contig_603_pilon_pilon-augustus-gene-3.33-mRNA-1	7
augustus_masked-tulip_contig_738_pilon_pilon-processed-gene-1.9-mRNA-1	7
maker-tulip_contig_855_pilon_pilon-augustus-gene-3.18-mRNA-1	7
augustus_masked-tulip_contig_855_pilon_pilon-processed-gene-3.0-mRNA-1	7
maker-tulip_contig_515_pilon_pilon-augustus-gene-6.5-mRNA-1	7
maker-tulip_contig_704_pilon_pilon-augustus-gene-2.16-mRNA-1	7
maker-tulip_contig_152_pilon_pilon-augustus-gene-0.4-mRNA-1	7
maker-tulip_contig_334_pilon_pilon-augustus-gene-2.32-mRNA-1	7
maker-tulip_contig_211_pilon_pilon-augustus-gene-1.26-mRNA-1	7
augustus_masked-tulip_contig_82_pilon_pilon-processed-gene-1.21-mRNA-1	7
augustus_masked-tulip_contig_807_pilon_pilon-processed-gene-0.11-mRNA-1	7
maker-tulip_contig_173_pilon_pilon-augustus-gene-0.27-mRNA-1	7
augustus_masked-tulip_contig_309_pilon_pilon-processed-gene-0.86-mRNA-1	7
maker-tulip_contig_414_pilon_pilon-augustus-gene-0.24-mRNA-1	7
augustus_masked-tulip_contig_867_pilon_pilon-processed-gene-3.22-mRNA-1	7
maker-tulip_contig_704_pilon_pilon-augustus-gene-2.28-mRNA-1	7
augustus_masked-tulip_contig_837_pilon_pilon-processed-gene-5.20-mRNA-1	7
maker-tulip_contig_279_pilon_pilon-augustus-gene-0.24-mRNA-1	7
maker-tulip_contig_884_pilon_pilon-augustus-gene-0.3-mRNA-1	7
maker-tulip_contig_281_pilon_pilon-augustus-gene-1.39-mRNA-1	7
augustus_masked-tulip_contig_181_pilon_pilon-processed-gene-1.43-mRNA-1	7
maker-tulip_contig_327_pilon_pilon-augustus-gene-9.12-mRNA-1	7
maker-tulip_contig_215_pilon_pilon-augustus-gene-0.1-mRNA-1	7
maker-tulip_contig_926_pilon_pilon-augustus-gene-0.8-mRNA-1	7
augustus_masked-tulip_contig_446_pilon_pilon-processed-gene-1.42-mRNA-1	7
augustus_masked-tulip_contig_148_pilon_pilon-processed-gene-0.62-mRNA-1	7
maker-tulip_contig_867_pilon_pilon-augustus-gene-3.38-mRNA-1	7
maker-tulip_contig_270_pilon_pilon-augustus-gene-3.64-mRNA-1	7
maker-tulip_contig_704_pilon_pilon-augustus-gene-2.27-mRNA-1	7
maker-tulip_contig_604_pilon_pilon-augustus-gene-3.43-mRNA-1	7
augustus_masked-tulip_contig_236_pilon_pilon-processed-gene-0.63-mRNA-1	7
augustus_masked-tulip_contig_211_pilon_pilon-processed-gene-1.0-mRNA-1	7
maker-tulip_contig_177_pilon_pilon-augustus-gene-1.1-mRNA-1	7
augustus_masked-tulip_contig_378_pilon_pilon-processed-gene-2.43-mRNA-1	7
maker-tulip_contig_815_pilon_pilon-augustus-gene-1.10-mRNA-1	7
augustus_masked-tulip_contig_41_pilon_pilon-processed-gene-0.5-mRNA-1	7
augustus_masked-tulip_contig_173_pilon_pilon-processed-gene-0.7-mRNA-1	7
maker-tulip_contig_1_pilon_pilon-augustus-gene-3.57-mRNA-1	7
augustus_masked-tulip_contig_451_pilon_pilon-processed-gene-0.3-mRNA-1	7
augustus_masked-tulip_contig_236_pilon_pilon-processed-gene-0.62-mRNA-1	7
augustus_masked-tulip_contig_410_pilon_pilon-processed-gene-0.0-mRNA-1	7
maker-tulip_contig_204_pilon_pilon-augustus-gene-0.4-mRNA-1	7
maker-tulip_contig_843_pilon_pilon-augustus-gene-6.4-mRNA-1	7
maker-tulip_contig_666_pilon_pilon-augustus-gene-0.23-mRNA-1	7
augustus_masked-tulip_contig_513_pilon_pilon-processed-gene-0.3-mRNA-1	7
maker-tulip_contig_237_pilon_pilon-augustus-gene-0.40-mRNA-1	7
maker-tulip_contig_831_pilon_pilon-augustus-gene-4.76-mRNA-1	7
augustus_masked-tulip_contig_531_pilon_pilon-processed-gene-5.80-mRNA-1	7
augustus_masked-tulip_contig_2_pilon_pilon-processed-gene-8.8-mRNA-1	7
augustus_masked-tulip_contig_59_pilon_pilon-processed-gene-1.18-mRNA-1	7
augustus_masked-tulip_contig_59_pilon_pilon-processed-gene-1.0-mRNA-1	7
augustus_masked-tulip_contig_61_pilon_pilon-processed-gene-0.83-mRNA-1	7
augustus_masked-tulip_contig_505_pilon_pilon-processed-gene-0.32-mRNA-1	7
augustus_masked-tulip_contig_270_pilon_pilon-processed-gene-2.16-mRNA-1	7
maker-tulip_contig_2_pilon_pilon-augustus-gene-8.28-mRNA-1	7
augustus_masked-tulip_contig_645_pilon_pilon-processed-gene-4.0-mRNA-1	7
augustus_masked-tulip_contig_715_pilon_pilon-processed-gene-0.48-mRNA-1	7
augustus_masked-tulip_contig_677_pilon_pilon-processed-gene-1.89-mRNA-1	7
augustus_masked-tulip_contig_394_pilon_pilon-processed-gene-3.50-mRNA-1	7
maker-tulip_contig_628_pilon_pilon-augustus-gene-0.6-mRNA-1	7
augustus_masked-tulip_contig_112_pilon_pilon-processed-gene-3.35-mRNA-1	7
augustus_masked-tulip_contig_306_pilon_pilon-processed-gene-0.11-mRNA-1	7
augustus_masked-tulip_contig_63_pilon_pilon-processed-gene-0.14-mRNA-1	7
maker-tulip_contig_55_pilon_pilon-augustus-gene-0.97-mRNA-1	7
maker-tulip_contig_345_pilon_pilon-augustus-gene-0.27-mRNA-1	7
augustus_masked-tulip_contig_773_pilon_pilon-processed-gene-0.10-mRNA-1	7
maker-tulip_contig_677_pilon_pilon-augustus-gene-1.10-mRNA-1	7
augustus_masked-tulip_contig_527_pilon_pilon-processed-gene-3.2-mRNA-1	7
maker-tulip_contig_323_pilon_pilon-augustus-gene-7.2-mRNA-1	7
maker-tulip_contig_659_pilon_pilon-augustus-gene-1.45-mRNA-1	7
maker-tulip_contig_693_pilon_pilon-augustus-gene-2.16-mRNA-1	7
maker-tulip_contig_777_pilon_pilon-augustus-gene-0.75-mRNA-1	7
augustus_masked-tulip_contig_867_pilon_pilon-processed-gene-3.26-mRNA-1	7
augustus_masked-tulip_contig_131_pilon_pilon-processed-gene-0.5-mRNA-1	7
maker-tulip_contig_303_pilon_pilon-augustus-gene-1.54-mRNA-1	7
maker-tulip_contig_276_pilon_pilon-augustus-gene-3.68-mRNA-1	7
maker-tulip_contig_316_pilon_pilon-augustus-gene-3.24-mRNA-1	7
augustus_masked-tulip_contig_584_pilon_pilon-processed-gene-0.21-mRNA-1	7
augustus_masked-tulip_contig_270_pilon_pilon-processed-gene-0.36-mRNA-1	7
augustus_masked-tulip_contig_270_pilon_pilon-processed-gene-3.210-mRNA-1	7
augustus_masked-tulip_contig_384_pilon_pilon-processed-gene-0.133-mRNA-1	7
maker-tulip_contig_448_pilon_pilon-augustus-gene-0.33-mRNA-1	7
maker-tulip_contig_860_pilon_pilon-augustus-gene-7.28-mRNA-1	7
maker-tulip_contig_441_pilon_pilon-augustus-gene-4.31-mRNA-1	7
maker-tulip_contig_82_pilon_pilon-augustus-gene-1.36-mRNA-1	7
augustus_masked-tulip_contig_161_pilon_pilon-processed-gene-0.16-mRNA-1	7
maker-tulip_contig_507_pilon_pilon-augustus-gene-0.57-mRNA-1	7
augustus_masked-tulip_contig_507_pilon_pilon-processed-gene-0.15-mRNA-1	7
augustus_masked-tulip_contig_837_pilon_pilon-processed-gene-2.8-mRNA-1	7
augustus_masked-tulip_contig_55_pilon_pilon-processed-gene-1.16-mRNA-1	7
maker-tulip_contig_867_pilon_pilon-augustus-gene-3.62-mRNA-1	7
augustus_masked-tulip_contig_190_pilon_pilon-processed-gene-3.42-mRNA-1	7
maker-tulip_contig_303_pilon_pilon-augustus-gene-0.43-mRNA-1	7
augustus_masked-tulip_contig_711_pilon_pilon-processed-gene-2.15-mRNA-1	7
maker-tulip_contig_424_pilon_pilon-augustus-gene-1.34-mRNA-1	7
maker-tulip_contig_148_pilon_pilon-augustus-gene-0.1-mRNA-1	7
maker-tulip_contig_527_pilon_pilon-augustus-gene-1.28-mRNA-1	7
maker-tulip_contig_537_pilon_pilon-augustus-gene-3.10-mRNA-1	7
maker-tulip_contig_669_pilon_pilon-augustus-gene-0.0-mRNA-1	7
maker-tulip_contig_46_pilon_pilon-augustus-gene-0.18-mRNA-1	7
maker-tulip_contig_182_pilon_pilon-augustus-gene-1.40-mRNA-1	7
maker-tulip_contig_674_pilon_pilon-augustus-gene-1.23-mRNA-1	7
maker-tulip_contig_3_pilon_pilon-augustus-gene-4.95-mRNA-1	7
maker-tulip_contig_396_pilon_pilon-augustus-gene-0.15-mRNA-1	7
augustus_masked-tulip_contig_160_pilon_pilon-processed-gene-0.3-mRNA-1	7
augustus_masked-tulip_contig_72_pilon_pilon-processed-gene-1.136-mRNA-1	7
augustus_masked-tulip_contig_190_pilon_pilon-processed-gene-3.41-mRNA-1	7
maker-tulip_contig_211_pilon_pilon-augustus-gene-4.98-mRNA-1	7
augustus_masked-tulip_contig_323_pilon_pilon-processed-gene-8.0-mRNA-1	7
maker-tulip_contig_39_pilon_pilon-augustus-gene-1.155-mRNA-1	14
maker-tulip_contig_208_pilon_pilon-augustus-gene-0.14-mRNA-1	14
augustus_masked-tulip_contig_177_pilon_pilon-processed-gene-1.46-mRNA-1	14
maker-tulip_contig_193_pilon_pilon-augustus-gene-0.8-mRNA-1	14
augustus_masked-tulip_contig_39_pilon_pilon-processed-gene-1.33-mRNA-1	14
maker-tulip_contig_192_pilon_pilon-augustus-gene-1.175-mRNA-1	14
maker-tulip_contig_192_pilon_pilon-augustus-gene-1.62-mRNA-1	14
maker-tulip_contig_192_pilon_pilon-augustus-gene-1.173-mRNA-1	14
maker-tulip_contig_309_pilon_pilon-augustus-gene-0.66-mRNA-1	14
maker-tulip_contig_39_pilon_pilon-augustus-gene-1.106-mRNA-1	14
augustus_masked-tulip_contig_208_pilon_pilon-processed-gene-0.2-mRNA-1	14
augustus_masked-tulip_contig_357_pilon_pilon-processed-gene-1.50-mRNA-1	14
augustus_masked-tulip_contig_205_pilon_pilon-processed-gene-0.4-mRNA-1	14
maker-tulip_contig_819_pilon_pilon-augustus-gene-2.0-mRNA-1	14
maker-tulip_contig_381_pilon_pilon-augustus-gene-0.106-mRNA-1	14
maker-tulip_contig_515_pilon_pilon-augustus-gene-7.1-mRNA-1	14
maker-tulip_contig_662_pilon_pilon-augustus-gene-2.41-mRNA-1	14
maker-tulip_contig_783_pilon_pilon-augustus-gene-0.44-mRNA-1	14
augustus_masked-tulip_contig_674_pilon_pilon-processed-gene-12.9-mRNA-1	14
maker-tulip_contig_391_pilon_pilon-augustus-gene-0.13-mRNA-1	14
maker-tulip_contig_640_pilon_pilon-augustus-gene-2.23-mRNA-1	14
maker-tulip_contig_334_pilon_pilon-augustus-gene-2.35-mRNA-1	14
augustus_masked-tulip_contig_515_pilon_pilon-processed-gene-7.55-mRNA-1	14
maker-tulip_contig_626_pilon_pilon-augustus-gene-1.44-mRNA-1	14
augustus_masked-tulip_contig_559_pilon_pilon-processed-gene-0.28-mRNA-1	14
maker-tulip_contig_37_pilon_pilon-augustus-gene-0.19-mRNA-1	14
maker-tulip_contig_465_pilon_pilon-augustus-gene-0.45-mRNA-1	14
maker-tulip_contig_292_pilon_pilon-augustus-gene-1.19-mRNA-1	14
maker-tulip_contig_781_pilon_pilon-augustus-gene-3.17-mRNA-1	14
maker-tulip_contig_633_pilon_pilon-augustus-gene-0.63-mRNA-1	14
maker-tulip_contig_446_pilon_pilon-augustus-gene-1.12-mRNA-1	14
augustus_masked-tulip_contig_837_pilon_pilon-processed-gene-0.5-mRNA-1	2
augustus_masked-tulip_contig_854_pilon_pilon-processed-gene-1.79-mRNA-1	2
maker-tulip_contig_669_pilon_pilon-augustus-gene-0.4-mRNA-1	2
maker-tulip_contig_66_pilon_pilon-augustus-gene-2.35-mRNA-1	2
maker-tulip_contig_190_pilon_pilon-augustus-gene-1.4-mRNA-1	2
augustus_masked-tulip_contig_159_pilon_pilon-processed-gene-2.39-mRNA-1	2
augustus_masked-tulip_contig_617_pilon_pilon-processed-gene-0.1-mRNA-1	2
augustus_masked-tulip_contig_48_pilon_pilon-processed-gene-0.8-mRNA-1	2
augustus_masked-tulip_contig_264_pilon_pilon-processed-gene-0.23-mRNA-1	2
maker-tulip_contig_247_pilon_pilon-augustus-gene-2.87-mRNA-1	2
maker-tulip_contig_825_pilon_pilon-augustus-gene-0.0-mRNA-1	2
augustus_masked-tulip_contig_159_pilon_pilon-processed-gene-2.40-mRNA-1	2
augustus_masked-tulip_contig_926_pilon_pilon-processed-gene-0.36-mRNA-1	2
maker-tulip_contig_547_pilon_pilon-augustus-gene-0.23-mRNA-1	2
augustus_masked-tulip_contig_321_pilon_pilon-processed-gene-0.37-mRNA-1	2
augustus_masked-tulip_contig_471_pilon_pilon-processed-gene-0.15-mRNA-1	2
maker-tulip_contig_907_pilon_pilon-augustus-gene-8.2-mRNA-1	2
maker-tulip_contig_555_pilon_pilon-augustus-gene-0.27-mRNA-1	2
maker-tulip_contig_593_pilon_pilon-augustus-gene-1.22-mRNA-1	2
maker-tulip_contig_464_pilon_pilon-augustus-gene-0.2-mRNA-1	2
maker-tulip_contig_42_pilon_pilon-augustus-gene-1.4-mRNA-1	2
maker-tulip_contig_679_pilon_pilon-augustus-gene-0.0-mRNA-1	2
maker-tulip_contig_73_pilon_pilon-augustus-gene-0.41-mRNA-1	2
maker-tulip_contig_474_pilon_pilon-augustus-gene-3.12-mRNA-1	2
maker-tulip_contig_555_pilon_pilon-augustus-gene-0.26-mRNA-1	2
augustus_masked-tulip_contig_917_pilon_pilon-processed-gene-0.12-mRNA-1	2
maker-tulip_contig_669_pilon_pilon-augustus-gene-1.54-mRNA-1	2
maker-tulip_contig_735_pilon_pilon-augustus-gene-0.4-mRNA-1	2
augustus_masked-tulip_contig_735_pilon_pilon-processed-gene-0.6-mRNA-1	2
augustus_masked-tulip_contig_735_pilon_pilon-processed-gene-0.10-mRNA-1	2
maker-tulip_contig_770_pilon_pilon-augustus-gene-0.0-mRNA-1	2
maker-tulip_contig_407_pilon_pilon-augustus-gene-8.83-mRNA-1	2
maker-tulip_contig_619_pilon_pilon-augustus-gene-0.24-mRNA-1	2
augustus_masked-tulip_contig_669_pilon_pilon-processed-gene-1.13-mRNA-1	2
augustus_masked-tulip_contig_669_pilon_pilon-processed-gene-1.20-mRNA-1	2
augustus_masked-tulip_contig_237_pilon_pilon-processed-gene-0.24-mRNA-1	2
maker-tulip_contig_706_pilon_pilon-augustus-gene-0.74-mRNA-1	2
maker-tulip_contig_597_pilon_pilon-augustus-gene-1.0-mRNA-1	2
maker-tulip_contig_926_pilon_pilon-augustus-gene-0.14-mRNA-1	2
maker-tulip_contig_634_pilon_pilon-augustus-gene-0.7-mRNA-1	2
augustus_masked-tulip_contig_669_pilon_pilon-processed-gene-1.18-mRNA-1	2
maker-tulip_contig_364_pilon_pilon-augustus-gene-0.38-mRNA-1	2
maker-tulip_contig_247_pilon_pilon-augustus-gene-0.18-mRNA-1	2
maker-tulip_contig_547_pilon_pilon-augustus-gene-6.66-mRNA-1	2
maker-tulip_contig_634_pilon_pilon-augustus-gene-0.9-mRNA-1	2
augustus_masked-tulip_contig_211_pilon_pilon-processed-gene-1.6-mRNA-1	2
augustus_masked-tulip_contig_867_pilon_pilon-processed-gene-3.10-mRNA-1	2
augustus_masked-tulip_contig_89_pilon_pilon-processed-gene-1.4-mRNA-1	2
augustus_masked-tulip_contig_321_pilon_pilon-processed-gene-0.29-mRNA-1	2
augustus_masked-tulip_contig_56_pilon_pilon-processed-gene-0.95-mRNA-1	2
maker-tulip_contig_327_pilon_pilon-augustus-gene-1.29-mRNA-1	2
maker-tulip_contig_443_pilon_pilon-augustus-gene-1.25-mRNA-1	2
maker-tulip_contig_637_pilon_pilon-augustus-gene-1.19-mRNA-1	2
maker-tulip_contig_639_pilon_pilon-augustus-gene-0.2-mRNA-1	2
augustus_masked-tulip_contig_837_pilon_pilon-processed-gene-2.9-mRNA-1	2
augustus_masked-tulip_contig_276_pilon_pilon-processed-gene-0.17-mRNA-1	2
augustus_masked-tulip_contig_907_pilon_pilon-processed-gene-1.5-mRNA-1	2
augustus_masked-tulip_contig_4_pilon_pilon-processed-gene-1.38-mRNA-1	2
maker-tulip_contig_372_pilon_pilon-augustus-gene-2.4-mRNA-1	2
augustus_masked-tulip_contig_628_pilon_pilon-processed-gene-4.23-mRNA-1	2
augustus_masked-tulip_contig_698_pilon_pilon-processed-gene-2.4-mRNA-1	2
augustus_masked-tulip_contig_39_pilon_pilon-processed-gene-1.5-mRNA-1	2
maker-tulip_contig_506_pilon_pilon-augustus-gene-1.128-mRNA-1	2
maker-tulip_contig_507_pilon_pilon-augustus-gene-1.34-mRNA-1	2
augustus_masked-tulip_contig_323_pilon_pilon-processed-gene-2.40-mRNA-1	2
augustus_masked-tulip_contig_809_pilon_pilon-processed-gene-3.2-mRNA-1	2
maker-tulip_contig_465_pilon_pilon-augustus-gene-0.39-mRNA-1	2
augustus_masked-tulip_contig_394_pilon_pilon-processed-gene-4.5-mRNA-1	2
augustus_masked-tulip_contig_907_pilon_pilon-processed-gene-8.44-mRNA-1	2
maker-tulip_contig_192_pilon_pilon-augustus-gene-0.10-mRNA-1	2
maker-tulip_contig_837_pilon_pilon-augustus-gene-5.8-mRNA-1	2
maker-tulip_contig_387_pilon_pilon-augustus-gene-1.88-mRNA-1	2
maker-tulip_contig_421_pilon_pilon-augustus-gene-0.3-mRNA-1	2
augustus_masked-tulip_contig_837_pilon_pilon-processed-gene-0.8-mRNA-1	2
maker-tulip_contig_323_pilon_pilon-augustus-gene-6.39-mRNA-1	2
maker-tulip_contig_407_pilon_pilon-augustus-gene-0.59-mRNA-1	2
maker-tulip_contig_674_pilon_pilon-augustus-gene-2.2-mRNA-1	2
augustus_masked-tulip_contig_161_pilon_pilon-processed-gene-0.30-mRNA-1	2
maker-tulip_contig_799_pilon_pilon-augustus-gene-0.8-mRNA-1	2
augustus_masked-tulip_contig_870_pilon_pilon-processed-gene-1.3-mRNA-1	2
augustus_masked-tulip_contig_126_pilon_pilon-processed-gene-1.3-mRNA-1	2
maker-tulip_contig_776_pilon_pilon-augustus-gene-0.46-mRNA-1	2
augustus_masked-tulip_contig_837_pilon_pilon-processed-gene-7.84-mRNA-1	2
augustus_masked-tulip_contig_290_pilon_pilon-processed-gene-1.35-mRNA-1	2
maker-tulip_contig_1_pilon_pilon-augustus-gene-3.0-mRNA-1	2
maker-tulip_contig_910_pilon_pilon-augustus-gene-0.3-mRNA-1	2
maker-tulip_contig_706_pilon_pilon-augustus-gene-0.85-mRNA-1	2
maker-tulip_contig_505_pilon_pilon-augustus-gene-3.76-mRNA-1	2
augustus_masked-tulip_contig_58_pilon_pilon-processed-gene-0.8-mRNA-1	2
augustus_masked-tulip_contig_860_pilon_pilon-processed-gene-6.33-mRNA-1	2
maker-tulip_contig_303_pilon_pilon-augustus-gene-0.47-mRNA-1	2
maker-tulip_contig_416_pilon_pilon-augustus-gene-0.21-mRNA-1	2
maker-tulip_contig_770_pilon_pilon-augustus-gene-0.9-mRNA-1	2
maker-tulip_contig_33_pilon_pilon-augustus-gene-4.0-mRNA-1	2
maker-tulip_contig_303_pilon_pilon-augustus-gene-0.66-mRNA-1	2
augustus_masked-tulip_contig_323_pilon_pilon-processed-gene-3.1-mRNA-1	2
augustus_masked-tulip_contig_474_pilon_pilon-processed-gene-2.29-mRNA-1	2
maker-tulip_contig_812_pilon_pilon-augustus-gene-0.15-mRNA-1	2
maker-tulip_contig_55_pilon_pilon-augustus-gene-0.44-mRNA-1	2
augustus_masked-tulip_contig_218_pilon_pilon-processed-gene-2.43-mRNA-1	2
maker-tulip_contig_252_pilon_pilon-augustus-gene-1.6-mRNA-1	2
maker-tulip_contig_394_pilon_pilon-augustus-gene-3.6-mRNA-1	2
maker-tulip_contig_620_pilon_pilon-augustus-gene-3.20-mRNA-1	2
maker-tulip_contig_264_pilon_pilon-augustus-gene-0.0-mRNA-1	2
maker-tulip_contig_424_pilon_pilon-augustus-gene-2.58-mRNA-1	2
augustus_masked-tulip_contig_275_pilon_pilon-processed-gene-0.59-mRNA-1	2
maker-tulip_contig_58_pilon_pilon-augustus-gene-0.34-mRNA-1	2
maker-tulip_contig_603_pilon_pilon-augustus-gene-2.16-mRNA-1	2
maker-tulip_contig_474_pilon_pilon-augustus-gene-6.1-mRNA-1	2
maker-tulip_contig_323_pilon_pilon-augustus-gene-6.41-mRNA-1	2
maker-tulip_contig_126_pilon_pilon-augustus-gene-2.58-mRNA-1	2
augustus_masked-tulip_contig_907_pilon_pilon-processed-gene-8.43-mRNA-1	2
maker-tulip_contig_829_pilon_pilon-augustus-gene-0.0-mRNA-1	2
maker-tulip_contig_691_pilon_pilon-augustus-gene-4.1-mRNA-1	2
maker-tulip_contig_46_pilon_pilon-augustus-gene-2.29-mRNA-1	2
augustus_masked-tulip_contig_843_pilon_pilon-processed-gene-7.27-mRNA-1	2
maker-tulip_contig_606_pilon_pilon-augustus-gene-0.14-mRNA-1	2
maker-tulip_contig_334_pilon_pilon-augustus-gene-1.17-mRNA-1	2
augustus_masked-tulip_contig_270_pilon_pilon-processed-gene-3.202-mRNA-1	2
augustus_masked-tulip_contig_586_pilon_pilon-processed-gene-12.53-mRNA-1	2
maker-tulip_contig_99_pilon_pilon-augustus-gene-0.14-mRNA-1	2
maker-tulip_contig_690_pilon_pilon-augustus-gene-5.79-mRNA-1	2
maker-tulip_contig_926_pilon_pilon-augustus-gene-0.16-mRNA-1	2
maker-tulip_contig_109_pilon_pilon-augustus-gene-0.27-mRNA-1	2
maker-tulip_contig_236_pilon_pilon-augustus-gene-8.45-mRNA-1	2
augustus_masked-tulip_contig_610_pilon_pilon-processed-gene-3.17-mRNA-1	2
maker-tulip_contig_837_pilon_pilon-augustus-gene-5.12-mRNA-1	2
augustus_masked-tulip_contig_4_pilon_pilon-processed-gene-0.21-mRNA-1	2
maker-tulip_contig_706_pilon_pilon-augustus-gene-0.18-mRNA-1	2
maker-tulip_contig_159_pilon_pilon-augustus-gene-1.35-mRNA-1	2
maker-tulip_contig_39_pilon_pilon-augustus-gene-1.149-mRNA-1	2
augustus_masked-tulip_contig_323_pilon_pilon-processed-gene-8.20-mRNA-1	2
augustus_masked-tulip_contig_547_pilon_pilon-processed-gene-5.0-mRNA-1	2
maker-tulip_contig_292_pilon_pilon-augustus-gene-0.43-mRNA-1	2
maker-tulip_contig_88_pilon_pilon-augustus-gene-0.71-mRNA-1	2
augustus_masked-tulip_contig_4_pilon_pilon-processed-gene-0.20-mRNA-1	2
maker-tulip_contig_281_pilon_pilon-augustus-gene-4.7-mRNA-1	2
augustus_masked-tulip_contig_133_pilon_pilon-processed-gene-0.0-mRNA-1	2
maker-tulip_contig_316_pilon_pilon-augustus-gene-3.51-mRNA-1	2
maker-tulip_contig_334_pilon_pilon-augustus-gene-1.20-mRNA-1	2
augustus_masked-tulip_contig_46_pilon_pilon-processed-gene-1.18-mRNA-1	2
maker-tulip_contig_362_pilon_pilon-augustus-gene-4.15-mRNA-1	2
maker-tulip_contig_338_pilon_pilon-augustus-gene-0.45-mRNA-1	2
maker-tulip_contig_416_pilon_pilon-augustus-gene-0.22-mRNA-1	2
augustus_masked-tulip_contig_236_pilon_pilon-processed-gene-1.2-mRNA-1	2
maker-tulip_contig_637_pilon_pilon-augustus-gene-1.0-mRNA-1	2
augustus_masked-tulip_contig_762_pilon_pilon-processed-gene-0.0-mRNA-1	2
augustus_masked-tulip_contig_145_pilon_pilon-processed-gene-4.16-mRNA-1	2
maker-tulip_contig_855_pilon_pilon-augustus-gene-1.44-mRNA-1	2
augustus_masked-tulip_contig_342_pilon_pilon-processed-gene-0.0-mRNA-1	2
maker-tulip_contig_587_pilon_pilon-augustus-gene-0.3-mRNA-1	2
maker-tulip_contig_506_pilon_pilon-augustus-gene-1.62-mRNA-1	2
augustus_masked-tulip_contig_504_pilon_pilon-processed-gene-2.38-mRNA-1	2
maker-tulip_contig_706_pilon_pilon-augustus-gene-0.16-mRNA-1	2
augustus_masked-tulip_contig_448_pilon_pilon-processed-gene-0.1-mRNA-1	2
augustus_masked-tulip_contig_44_pilon_pilon-processed-gene-5.18-mRNA-1	2
maker-tulip_contig_270_pilon_pilon-augustus-gene-3.112-mRNA-1	2
maker-tulip_contig_281_pilon_pilon-augustus-gene-5.32-mRNA-1	2
augustus_masked-tulip_contig_187_pilon_pilon-processed-gene-1.16-mRNA-1	2
maker-tulip_contig_407_pilon_pilon-augustus-gene-4.75-mRNA-1	2
augustus_masked-tulip_contig_61_pilon_pilon-processed-gene-0.67-mRNA-1	2
maker-tulip_contig_843_pilon_pilon-augustus-gene-7.16-mRNA-1	2
augustus_masked-tulip_contig_625_pilon_pilon-processed-gene-0.10-mRNA-1	2
augustus_masked-tulip_contig_270_pilon_pilon-processed-gene-1.91-mRNA-1	2
augustus_masked-tulip_contig_620_pilon_pilon-processed-gene-1.36-mRNA-1	2
maker-tulip_contig_843_pilon_pilon-augustus-gene-7.4-mRNA-1	2
augustus_masked-tulip_contig_860_pilon_pilon-processed-gene-3.30-mRNA-1	2
maker-tulip_contig_531_pilon_pilon-augustus-gene-1.3-mRNA-1	2
augustus_masked-tulip_contig_783_pilon_pilon-processed-gene-0.1-mRNA-1	2
maker-tulip_contig_58_pilon_pilon-augustus-gene-0.32-mRNA-1	2
maker-tulip_contig_204_pilon_pilon-augustus-gene-1.0-mRNA-1	2
augustus_masked-tulip_contig_199_pilon_pilon-processed-gene-7.6-mRNA-1	2
maker-tulip_contig_934_pilon_pilon-augustus-gene-1.16-mRNA-1	2
maker-tulip_contig_58_pilon_pilon-augustus-gene-0.47-mRNA-1	2
maker-tulip_contig_837_pilon_pilon-augustus-gene-0.0-mRNA-1	2
maker-tulip_contig_250_pilon_pilon-augustus-gene-0.13-mRNA-1	2
maker-tulip_contig_673_pilon_pilon-augustus-gene-1.62-mRNA-1	2
maker-tulip_contig_823_pilon_pilon-augustus-gene-0.8-mRNA-1	2
maker-tulip_contig_323_pilon_pilon-augustus-gene-2.12-mRNA-1	2
maker-tulip_contig_33_pilon_pilon-augustus-gene-0.67-mRNA-1	2
maker-tulip_contig_655_pilon_pilon-augustus-gene-0.19-mRNA-1	2
augustus_masked-tulip_contig_895_pilon_pilon-processed-gene-0.3-mRNA-1	2
maker-tulip_contig_159_pilon_pilon-augustus-gene-1.2-mRNA-1	2
maker-tulip_contig_620_pilon_pilon-augustus-gene-3.19-mRNA-1	2
maker-tulip_contig_698_pilon_pilon-augustus-gene-3.0-mRNA-1	2
maker-tulip_contig_620_pilon_pilon-augustus-gene-3.18-mRNA-1	2
maker-tulip_contig_620_pilon_pilon-augustus-gene-3.6-mRNA-1	2
maker-tulip_contig_620_pilon_pilon-augustus-gene-3.15-mRNA-1	2
maker-tulip_contig_843_pilon_pilon-augustus-gene-7.6-mRNA-1	2
maker-tulip_contig_41_pilon_pilon-augustus-gene-0.13-mRNA-1	2
maker-tulip_contig_73_pilon_pilon-augustus-gene-0.42-mRNA-1	2
maker-tulip_contig_334_pilon_pilon-augustus-gene-1.26-mRNA-1	2
maker-tulip_contig_247_pilon_pilon-augustus-gene-2.90-mRNA-1	2
augustus_masked-tulip_contig_86_pilon_pilon-processed-gene-0.4-mRNA-1	2
maker-tulip_contig_839_pilon_pilon-augustus-gene-1.26-mRNA-1	2
maker-tulip_contig_770_pilon_pilon-augustus-gene-0.8-mRNA-1	2
augustus_masked-tulip_contig_895_pilon_pilon-processed-gene-3.39-mRNA-1	2
augustus_masked-tulip_contig_72_pilon_pilon-processed-gene-2.2-mRNA-1	2
maker-tulip_contig_738_pilon_pilon-augustus-gene-1.16-mRNA-1	2
maker-tulip_contig_690_pilon_pilon-augustus-gene-1.52-mRNA-1	2
augustus_masked-tulip_contig_334_pilon_pilon-processed-gene-4.19-mRNA-1	2
maker-tulip_contig_839_pilon_pilon-augustus-gene-1.39-mRNA-1	2
maker-tulip_contig_441_pilon_pilon-augustus-gene-1.47-mRNA-1	2
maker-tulip_contig_601_pilon_pilon-augustus-gene-0.0-mRNA-1	2
maker-tulip_contig_361_pilon_pilon-augustus-gene-1.12-mRNA-1	2
maker-tulip_contig_773_pilon_pilon-augustus-gene-2.48-mRNA-1	2
augustus_masked-tulip_contig_491_pilon_pilon-processed-gene-1.82-mRNA-1	2
maker-tulip_contig_412_pilon_pilon-augustus-gene-0.53-mRNA-1	2
augustus_masked-tulip_contig_679_pilon_pilon-processed-gene-0.4-mRNA-1	2
maker-tulip_contig_240_pilon_pilon-augustus-gene-0.2-mRNA-1	2
maker-tulip_contig_270_pilon_pilon-augustus-gene-1.17-mRNA-1	2
maker-tulip_contig_46_pilon_pilon-augustus-gene-1.2-mRNA-1	2
maker-tulip_contig_416_pilon_pilon-augustus-gene-0.54-mRNA-1	2
augustus_masked-tulip_contig_290_pilon_pilon-processed-gene-5.55-mRNA-1	2
augustus_masked-tulip_contig_515_pilon_pilon-processed-gene-3.66-mRNA-1	2
maker-tulip_contig_698_pilon_pilon-augustus-gene-4.21-mRNA-1	2
maker-tulip_contig_586_pilon_pilon-augustus-gene-1.8-mRNA-1	2
augustus_masked-tulip_contig_145_pilon_pilon-processed-gene-5.18-mRNA-1	2
maker-tulip_contig_525_pilon_pilon-augustus-gene-0.15-mRNA-1	2
maker-tulip_contig_33_pilon_pilon-augustus-gene-0.90-mRNA-1	2
maker-tulip_contig_307_pilon_pilon-augustus-gene-0.20-mRNA-1	2
augustus_masked-tulip_contig_236_pilon_pilon-processed-gene-5.3-mRNA-1	2
maker-tulip_contig_666_pilon_pilon-augustus-gene-2.13-mRNA-1	2
augustus_masked-tulip_contig_61_pilon_pilon-processed-gene-0.88-mRNA-1	2
augustus_masked-tulip_contig_407_pilon_pilon-processed-gene-0.24-mRNA-1	2
maker-tulip_contig_58_pilon_pilon-augustus-gene-0.33-mRNA-1	2
maker-tulip_contig_479_pilon_pilon-augustus-gene-0.3-mRNA-1	2
maker-tulip_contig_343_pilon_pilon-augustus-gene-0.15-mRNA-1	2
augustus_masked-tulip_contig_323_pilon_pilon-processed-gene-4.30-mRNA-1	2
maker-tulip_contig_327_pilon_pilon-augustus-gene-10.47-mRNA-1	2
augustus_masked-tulip_contig_654_pilon_pilon-processed-gene-1.29-mRNA-1	2
augustus_masked-tulip_contig_159_pilon_pilon-processed-gene-2.41-mRNA-1	2
maker-tulip_contig_619_pilon_pilon-augustus-gene-1.33-mRNA-1	2
maker-tulip_contig_799_pilon_pilon-augustus-gene-0.10-mRNA-1	2
maker-tulip_contig_691_pilon_pilon-augustus-gene-2.26-mRNA-1	2
maker-tulip_contig_316_pilon_pilon-augustus-gene-0.1-mRNA-1	2
augustus_masked-tulip_contig_334_pilon_pilon-processed-gene-4.20-mRNA-1	2
maker-tulip_contig_454_pilon_pilon-augustus-gene-0.29-mRNA-1	2
maker-tulip_contig_881_pilon_pilon-augustus-gene-0.43-mRNA-1	2
augustus_masked-tulip_contig_272_pilon_pilon-processed-gene-5.5-mRNA-1	2
maker-tulip_contig_616_pilon_pilon-augustus-gene-1.25-mRNA-1	2
maker-tulip_contig_402_pilon_pilon-augustus-gene-1.19-mRNA-1	2
maker-tulip_contig_218_pilon_pilon-augustus-gene-0.56-mRNA-1	2
maker-tulip_contig_73_pilon_pilon-augustus-gene-0.43-mRNA-1	2
maker-tulip_contig_316_pilon_pilon-augustus-gene-3.50-mRNA-1	2
maker-tulip_contig_706_pilon_pilon-augustus-gene-0.81-mRNA-1	2
augustus_masked-tulip_contig_272_pilon_pilon-processed-gene-5.4-mRNA-1	2
augustus_masked-tulip_contig_619_pilon_pilon-processed-gene-0.10-mRNA-1	2
augustus_masked-tulip_contig_323_pilon_pilon-processed-gene-2.47-mRNA-1	2
maker-tulip_contig_323_pilon_pilon-augustus-gene-6.33-mRNA-1	2
maker-tulip_contig_881_pilon_pilon-augustus-gene-0.30-mRNA-1	2
maker-tulip_contig_799_pilon_pilon-augustus-gene-0.11-mRNA-1	2
maker-tulip_contig_159_pilon_pilon-augustus-gene-1.40-mRNA-1	2
maker-tulip_contig_190_pilon_pilon-augustus-gene-1.1-mRNA-1	2
maker-tulip_contig_860_pilon_pilon-augustus-gene-2.4-mRNA-1	2
augustus_masked-tulip_contig_46_pilon_pilon-processed-gene-2.1-mRNA-1	2
augustus_masked-tulip_contig_479_pilon_pilon-processed-gene-1.7-mRNA-1	2
maker-tulip_contig_843_pilon_pilon-augustus-gene-7.15-mRNA-1	2
maker-tulip_contig_387_pilon_pilon-augustus-gene-1.91-mRNA-1	2
maker-tulip_contig_633_pilon_pilon-augustus-gene-0.78-mRNA-1	2
maker-tulip_contig_784_pilon_pilon-augustus-gene-0.26-mRNA-1	2
maker-tulip_contig_823_pilon_pilon-augustus-gene-0.5-mRNA-1	2
maker-tulip_contig_162_pilon_pilon-augustus-gene-0.5-mRNA-1	2
maker-tulip_contig_605_pilon_pilon-augustus-gene-0.59-mRNA-1	2
maker-tulip_contig_159_pilon_pilon-augustus-gene-1.51-mRNA-1	2
augustus_masked-tulip_contig_907_pilon_pilon-processed-gene-5.23-mRNA-1	2
augustus_masked-tulip_contig_819_pilon_pilon-processed-gene-2.23-mRNA-1	2
maker-tulip_contig_264_pilon_pilon-augustus-gene-0.4-mRNA-1	2
maker-tulip_contig_192_pilon_pilon-augustus-gene-0.0-mRNA-1	2
maker-tulip_contig_639_pilon_pilon-augustus-gene-0.27-mRNA-1	2
maker-tulip_contig_843_pilon_pilon-augustus-gene-7.0-mRNA-1	2
maker-tulip_contig_767_pilon_pilon-augustus-gene-0.46-mRNA-1	2
augustus_masked-tulip_contig_547_pilon_pilon-processed-gene-0.7-mRNA-1	2
maker-tulip_contig_854_pilon_pilon-augustus-gene-1.51-mRNA-1	2
maker-tulip_contig_619_pilon_pilon-augustus-gene-0.35-mRNA-1	2
augustus_masked-tulip_contig_855_pilon_pilon-processed-gene-1.0-mRNA-1	2
maker-tulip_contig_250_pilon_pilon-augustus-gene-0.5-mRNA-1	2
maker-tulip_contig_447_pilon_pilon-augustus-gene-0.21-mRNA-1	2
maker-tulip_contig_387_pilon_pilon-augustus-gene-0.7-mRNA-1	2
augustus_masked-tulip_contig_247_pilon_pilon-processed-gene-0.5-mRNA-1	2
augustus_masked-tulip_contig_1_pilon_pilon-processed-gene-5.20-mRNA-1	2
augustus_masked-tulip_contig_691_pilon_pilon-processed-gene-2.12-mRNA-1	2
maker-tulip_contig_110_pilon_pilon-augustus-gene-2.14-mRNA-1	2
maker-tulip_contig_407_pilon_pilon-augustus-gene-8.86-mRNA-1	2
maker-tulip_contig_159_pilon_pilon-augustus-gene-2.6-mRNA-1	2
augustus_masked-tulip_contig_513_pilon_pilon-processed-gene-0.6-mRNA-1	2
augustus_masked-tulip_contig_276_pilon_pilon-processed-gene-0.18-mRNA-1	2
maker-tulip_contig_250_pilon_pilon-augustus-gene-0.6-mRNA-1	2
augustus_masked-tulip_contig_61_pilon_pilon-processed-gene-0.87-mRNA-1	2
maker-tulip_contig_60_pilon_pilon-augustus-gene-0.77-mRNA-1	2
maker-tulip_contig_735_pilon_pilon-augustus-gene-0.2-mRNA-1	2
maker-tulip_contig_323_pilon_pilon-augustus-gene-4.4-mRNA-1	2
augustus_masked-tulip_contig_375_pilon_pilon-processed-gene-0.18-mRNA-1	2
maker-tulip_contig_669_pilon_pilon-augustus-gene-1.64-mRNA-1	2
augustus_masked-tulip_contig_396_pilon_pilon-processed-gene-0.80-mRNA-1	2
maker-tulip_contig_252_pilon_pilon-augustus-gene-0.31-mRNA-1	2
maker-tulip_contig_318_pilon_pilon-augustus-gene-1.19-mRNA-1	2
maker-tulip_contig_586_pilon_pilon-augustus-gene-0.45-mRNA-1	2
maker-tulip_contig_4_pilon_pilon-augustus-gene-1.11-mRNA-1	2
maker-tulip_contig_654_pilon_pilon-augustus-gene-1.64-mRNA-1	2
maker-tulip_contig_597_pilon_pilon-augustus-gene-1.6-mRNA-1	2
maker-tulip_contig_407_pilon_pilon-augustus-gene-8.43-mRNA-1	2
maker-tulip_contig_823_pilon_pilon-augustus-gene-0.7-mRNA-1	2
maker-tulip_contig_159_pilon_pilon-augustus-gene-1.37-mRNA-1	2
augustus_masked-tulip_contig_881_pilon_pilon-processed-gene-0.7-mRNA-1	2
augustus_masked-tulip_contig_416_pilon_pilon-processed-gene-0.4-mRNA-1	2
maker-tulip_contig_645_pilon_pilon-augustus-gene-0.14-mRNA-1	2
maker-tulip_contig_691_pilon_pilon-augustus-gene-4.0-mRNA-1	2
maker-tulip_contig_323_pilon_pilon-augustus-gene-4.7-mRNA-1	2
augustus_masked-tulip_contig_405_pilon_pilon-processed-gene-0.6-mRNA-1	2
augustus_masked-tulip_contig_110_pilon_pilon-processed-gene-3.10-mRNA-1	2
maker-tulip_contig_515_pilon_pilon-augustus-gene-7.10-mRNA-1	2
maker-tulip_contig_185_pilon_pilon-augustus-gene-0.18-mRNA-1	2
augustus_masked-tulip_contig_334_pilon_pilon-processed-gene-1.5-mRNA-1	2
augustus_masked-tulip_contig_264_pilon_pilon-processed-gene-2.4-mRNA-1	2
maker-tulip_contig_321_pilon_pilon-augustus-gene-1.34-mRNA-1	2
maker-tulip_contig_745_pilon_pilon-augustus-gene-0.6-mRNA-1	2
maker-tulip_contig_748_pilon_pilon-augustus-gene-1.25-mRNA-1	2
maker-tulip_contig_303_pilon_pilon-augustus-gene-0.46-mRNA-1	2
maker-tulip_contig_745_pilon_pilon-augustus-gene-1.19-mRNA-1	2
augustus_masked-tulip_contig_61_pilon_pilon-processed-gene-0.72-mRNA-1	2
augustus_masked-tulip_contig_617_pilon_pilon-processed-gene-0.2-mRNA-1	2
maker-tulip_contig_321_pilon_pilon-augustus-gene-0.14-mRNA-1	2
augustus_masked-tulip_contig_251_pilon_pilon-processed-gene-0.10-mRNA-1	2
augustus_masked-tulip_contig_416_pilon_pilon-processed-gene-0.1-mRNA-1	2
maker-tulip_contig_368_pilon_pilon-augustus-gene-0.68-mRNA-1	2
maker-tulip_contig_860_pilon_pilon-augustus-gene-4.9-mRNA-1	2
maker-tulip_contig_887_pilon_pilon-augustus-gene-0.1-mRNA-1	2
augustus_masked-tulip_contig_308_pilon_pilon-processed-gene-0.1-mRNA-1	2
maker-tulip_contig_436_pilon_pilon-augustus-gene-0.11-mRNA-1	2
maker-tulip_contig_634_pilon_pilon-augustus-gene-0.5-mRNA-1	2
maker-tulip_contig_593_pilon_pilon-augustus-gene-0.16-mRNA-1	2
maker-tulip_contig_460_pilon_pilon-augustus-gene-0.40-mRNA-1	2
maker-tulip_contig_547_pilon_pilon-augustus-gene-0.8-mRNA-1	2
maker-tulip_contig_799_pilon_pilon-augustus-gene-0.9-mRNA-1	2
augustus_masked-tulip_contig_46_pilon_pilon-processed-gene-2.2-mRNA-1	2
maker-tulip_contig_394_pilon_pilon-augustus-gene-2.6-mRNA-1	2
maker-tulip_contig_619_pilon_pilon-augustus-gene-0.20-mRNA-1	2
augustus_masked-tulip_contig_159_pilon_pilon-processed-gene-2.43-mRNA-1	2
maker-tulip_contig_44_pilon_pilon-augustus-gene-7.59-mRNA-1	2
maker-tulip_contig_907_pilon_pilon-augustus-gene-1.15-mRNA-1	2
augustus_masked-tulip_contig_860_pilon_pilon-processed-gene-4.26-mRNA-1	2
maker-tulip_contig_284_pilon_pilon-augustus-gene-0.4-mRNA-1	2
augustus_masked-tulip_contig_61_pilon_pilon-processed-gene-0.71-mRNA-1	2
augustus_masked-tulip_contig_247_pilon_pilon-processed-gene-0.6-mRNA-1	2
maker-tulip_contig_770_pilon_pilon-augustus-gene-0.7-mRNA-1	2
augustus_masked-tulip_contig_513_pilon_pilon-processed-gene-0.11-mRNA-1	2
augustus_masked-tulip_contig_654_pilon_pilon-processed-gene-1.28-mRNA-1	2
maker-tulip_contig_860_pilon_pilon-augustus-gene-4.8-mRNA-1	2
maker-tulip_contig_410_pilon_pilon-augustus-gene-0.13-mRNA-1	2
maker-tulip_contig_887_pilon_pilon-augustus-gene-0.2-mRNA-1	2
maker-tulip_contig_42_pilon_pilon-augustus-gene-1.37-mRNA-1	2
maker-tulip_contig_799_pilon_pilon-augustus-gene-0.12-mRNA-1	2
maker-tulip_contig_407_pilon_pilon-augustus-gene-0.32-mRNA-1	2
augustus_masked-tulip_contig_669_pilon_pilon-processed-gene-1.11-mRNA-1	2
maker-tulip_contig_446_pilon_pilon-augustus-gene-1.3-mRNA-1	2
maker-tulip_contig_474_pilon_pilon-augustus-gene-1.15-mRNA-1	2
maker-tulip_contig_138_pilon_pilon-augustus-gene-0.61-mRNA-1	2
maker-tulip_contig_690_pilon_pilon-augustus-gene-5.83-mRNA-1	2
maker-tulip_contig_111_pilon_pilon-augustus-gene-0.49-mRNA-1	2
augustus_masked-tulip_contig_862_pilon_pilon-processed-gene-1.2-mRNA-1	2
augustus_masked-tulip_contig_753_pilon_pilon-processed-gene-1.15-mRNA-1	12
augustus_masked-tulip_contig_753_pilon_pilon-processed-gene-1.30-mRNA-1	12
augustus_masked-tulip_contig_753_pilon_pilon-processed-gene-1.14-mRNA-1	12
augustus_masked-tulip_contig_753_pilon_pilon-processed-gene-1.31-mRNA-1	12
augustus_masked-tulip_contig_753_pilon_pilon-processed-gene-1.16-mRNA-1	12
maker-tulip_contig_831_pilon_pilon-augustus-gene-1.9-mRNA-1	12
maker-tulip_contig_2_pilon_pilon-augustus-gene-2.43-mRNA-1	12
augustus_masked-tulip_contig_753_pilon_pilon-processed-gene-1.13-mRNA-1	12
augustus_masked-tulip_contig_586_pilon_pilon-processed-gene-10.19-mRNA-1	12
maker-tulip_contig_807_pilon_pilon-augustus-gene-3.57-mRNA-1	12
maker-tulip_contig_591_pilon_pilon-augustus-gene-0.0-mRNA-1	12
maker-tulip_contig_781_pilon_pilon-augustus-gene-2.0-mRNA-1	12
augustus_masked-tulip_contig_126_pilon_pilon-processed-gene-2.249-mRNA-1	12
maker-tulip_contig_907_pilon_pilon-augustus-gene-2.6-mRNA-1	12
maker-tulip_contig_200_pilon_pilon-augustus-gene-0.10-mRNA-1	12
maker-tulip_contig_281_pilon_pilon-augustus-gene-1.7-mRNA-1	12
maker-tulip_contig_175_pilon_pilon-augustus-gene-4.59-mRNA-1	12
augustus_masked-tulip_contig_648_pilon_pilon-processed-gene-1.4-mRNA-1	12
augustus_masked-tulip_contig_331_pilon_pilon-processed-gene-3.11-mRNA-1	12
maker-tulip_contig_907_pilon_pilon-augustus-gene-2.19-mRNA-1	12
maker-tulip_contig_907_pilon_pilon-augustus-gene-0.18-mRNA-1	12
maker-tulip_contig_843_pilon_pilon-augustus-gene-8.20-mRNA-1	12
maker-tulip_contig_292_pilon_pilon-augustus-gene-0.45-mRNA-1	12
maker-tulip_contig_674_pilon_pilon-augustus-gene-1.44-mRNA-1	12
maker-tulip_contig_394_pilon_pilon-augustus-gene-4.51-mRNA-1	12
maker-tulip_contig_422_pilon_pilon-augustus-gene-0.13-mRNA-1	12
augustus_masked-tulip_contig_281_pilon_pilon-processed-gene-1.55-mRNA-1	12
maker-tulip_contig_271_pilon_pilon-augustus-gene-1.65-mRNA-1	12
maker-tulip_contig_234_pilon_pilon-augustus-gene-5.34-mRNA-1	12
augustus_masked-tulip_contig_272_pilon_pilon-processed-gene-1.17-mRNA-1	12
maker-tulip_contig_454_pilon_pilon-augustus-gene-4.36-mRNA-1	12
augustus_masked-tulip_contig_870_pilon_pilon-processed-gene-2.22-mRNA-1	12
maker-tulip_contig_234_pilon_pilon-augustus-gene-5.35-mRNA-1	12
augustus_masked-tulip_contig_307_pilon_pilon-processed-gene-1.9-mRNA-1	12
maker-tulip_contig_732_pilon_pilon-augustus-gene-4.50-mRNA-1	12
augustus_masked-tulip_contig_645_pilon_pilon-processed-gene-3.53-mRNA-1	12
augustus_masked-tulip_contig_809_pilon_pilon-processed-gene-3.10-mRNA-1	12
augustus_masked-tulip_contig_59_pilon_pilon-processed-gene-1.10-mRNA-1	12
maker-tulip_contig_2_pilon_pilon-augustus-gene-4.13-mRNA-1	12
augustus_masked-tulip_contig_208_pilon_pilon-processed-gene-1.1-mRNA-1	12
augustus_masked-tulip_contig_321_pilon_pilon-processed-gene-0.39-mRNA-1	12
augustus_masked-tulip_contig_318_pilon_pilon-processed-gene-2.28-mRNA-1	12
augustus_masked-tulip_contig_318_pilon_pilon-processed-gene-2.30-mRNA-1	12
maker-tulip_contig_584_pilon_pilon-augustus-gene-3.51-mRNA-1	12
maker-tulip_contig_44_pilon_pilon-augustus-gene-5.0-mRNA-1	12
maker-tulip_contig_329_pilon_pilon-augustus-gene-0.28-mRNA-1	12
augustus_masked-tulip_contig_260_pilon_pilon-processed-gene-0.48-mRNA-1	12
maker-tulip_contig_198_pilon_pilon-augustus-gene-3.2-mRNA-1	12
maker-tulip_contig_807_pilon_pilon-augustus-gene-3.68-mRNA-1	12
maker-tulip_contig_560_pilon_pilon-augustus-gene-2.31-mRNA-1	12
augustus_masked-tulip_contig_236_pilon_pilon-processed-gene-0.50-mRNA-1	12
augustus_masked-tulip_contig_31_pilon_pilon-processed-gene-1.31-mRNA-1	12
maker-tulip_contig_781_pilon_pilon-augustus-gene-4.15-mRNA-1	12
maker-tulip_contig_867_pilon_pilon-augustus-gene-3.65-mRNA-1	12
maker-tulip_contig_276_pilon_pilon-augustus-gene-1.39-mRNA-1	12
maker-tulip_contig_46_pilon_pilon-augustus-gene-1.6-mRNA-1	12
augustus_masked-tulip_contig_339_pilon_pilon-processed-gene-0.16-mRNA-1	12
maker-tulip_contig_196_pilon_pilon-augustus-gene-1.50-mRNA-1	12
maker-tulip_contig_317_pilon_pilon-augustus-gene-1.10-mRNA-1	12
maker-tulip_contig_339_pilon_pilon-augustus-gene-0.83-mRNA-1	12
maker-tulip_contig_281_pilon_pilon-augustus-gene-1.17-mRNA-1	12
augustus_masked-tulip_contig_867_pilon_pilon-processed-gene-3.29-mRNA-1	12
maker-tulip_contig_290_pilon_pilon-augustus-gene-3.18-mRNA-1	12
augustus_masked-tulip_contig_690_pilon_pilon-processed-gene-2.19-mRNA-1	12
maker-tulip_contig_422_pilon_pilon-augustus-gene-0.17-mRNA-1	12
augustus_masked-tulip_contig_422_pilon_pilon-processed-gene-0.11-mRNA-1	12
maker-tulip_contig_200_pilon_pilon-augustus-gene-0.8-mRNA-1	12
maker-tulip_contig_281_pilon_pilon-augustus-gene-1.25-mRNA-1	12
augustus_masked-tulip_contig_224_pilon_pilon-processed-gene-2.20-mRNA-1	12
augustus_masked-tulip_contig_208_pilon_pilon-processed-gene-1.11-mRNA-1	12
maker-tulip_contig_668_pilon_pilon-augustus-gene-0.11-mRNA-1	12
maker-tulip_contig_505_pilon_pilon-augustus-gene-3.46-mRNA-1	12
augustus_masked-tulip_contig_854_pilon_pilon-processed-gene-1.74-mRNA-1	12
augustus_masked-tulip_contig_812_pilon_pilon-processed-gene-1.2-mRNA-1	12
maker-tulip_contig_436_pilon_pilon-augustus-gene-0.12-mRNA-1	12
maker-tulip_contig_626_pilon_pilon-augustus-gene-1.46-mRNA-1	12
augustus_masked-tulip_contig_444_pilon_pilon-processed-gene-0.4-mRNA-1	12
maker-tulip_contig_234_pilon_pilon-augustus-gene-5.36-mRNA-1	12
maker-tulip_contig_474_pilon_pilon-augustus-gene-1.55-mRNA-1	12
maker-tulip_contig_464_pilon_pilon-augustus-gene-0.7-mRNA-1	12
maker-tulip_contig_691_pilon_pilon-augustus-gene-3.17-mRNA-1	12
maker-tulip_contig_867_pilon_pilon-augustus-gene-3.43-mRNA-1	12
maker-tulip_contig_674_pilon_pilon-augustus-gene-3.1-mRNA-1	12
maker-tulip_contig_806_pilon_pilon-augustus-gene-2.18-mRNA-1	12
maker-tulip_contig_208_pilon_pilon-augustus-gene-1.65-mRNA-1	12
maker-tulip_contig_626_pilon_pilon-augustus-gene-0.25-mRNA-1	12
augustus_masked-tulip_contig_208_pilon_pilon-processed-gene-1.12-mRNA-1	12
maker-tulip_contig_112_pilon_pilon-augustus-gene-0.35-mRNA-1	12
maker-tulip_contig_187_pilon_pilon-augustus-gene-0.0-mRNA-1	12
augustus_masked-tulip_contig_187_pilon_pilon-processed-gene-0.9-mRNA-1	12
maker-tulip_contig_515_pilon_pilon-augustus-gene-1.65-mRNA-1	12
augustus_masked-tulip_contig_837_pilon_pilon-processed-gene-2.4-mRNA-1	12
maker-tulip_contig_527_pilon_pilon-augustus-gene-1.45-mRNA-1	12
augustus_masked-tulip_contig_444_pilon_pilon-processed-gene-0.3-mRNA-1	12
maker-tulip_contig_831_pilon_pilon-augustus-gene-1.2-mRNA-1	1
augustus_masked-tulip_contig_199_pilon_pilon-processed-gene-4.21-mRNA-1	1
maker-tulip_contig_331_pilon_pilon-augustus-gene-3.25-mRNA-1	1
augustus_masked-tulip_contig_412_pilon_pilon-processed-gene-0.64-mRNA-1	1
maker-tulip_contig_199_pilon_pilon-augustus-gene-4.112-mRNA-1	1
maker-tulip_contig_145_pilon_pilon-augustus-gene-6.58-mRNA-1	1
maker-tulip_contig_199_pilon_pilon-augustus-gene-4.87-mRNA-1	1
maker-tulip_contig_247_pilon_pilon-augustus-gene-2.39-mRNA-1	1
maker-tulip_contig_34_pilon_pilon-augustus-gene-0.126-mRNA-1	1
maker-tulip_contig_559_pilon_pilon-augustus-gene-0.3-mRNA-1	1
augustus_masked-tulip_contig_559_pilon_pilon-processed-gene-0.29-mRNA-1	1
augustus_masked-tulip_contig_339_pilon_pilon-processed-gene-0.7-mRNA-1	1
maker-tulip_contig_916_pilon_pilon-augustus-gene-1.16-mRNA-1	1
augustus_masked-tulip_contig_125_pilon_pilon-processed-gene-0.403-mRNA-1	1
maker-tulip_contig_623_pilon_pilon-augustus-gene-5.48-mRNA-1	1
maker-tulip_contig_199_pilon_pilon-augustus-gene-4.47-mRNA-1	1
maker-tulip_contig_640_pilon_pilon-augustus-gene-2.22-mRNA-1	1
maker-tulip_contig_451_pilon_pilon-augustus-gene-1.45-mRNA-1	1
maker-tulip_contig_907_pilon_pilon-augustus-gene-8.20-mRNA-1	1
augustus_masked-tulip_contig_559_pilon_pilon-processed-gene-3.33-mRNA-1	1
maker-tulip_contig_1_pilon_pilon-augustus-gene-4.4-mRNA-1	1
augustus_masked-tulip_contig_42_pilon_pilon-processed-gene-0.13-mRNA-1	1
maker-tulip_contig_220_pilon_pilon-augustus-gene-0.28-mRNA-1	1
maker-tulip_contig_407_pilon_pilon-augustus-gene-8.38-mRNA-1	1
maker-tulip_contig_407_pilon_pilon-augustus-gene-5.64-mRNA-1	1
maker-tulip_contig_623_pilon_pilon-augustus-gene-5.101-mRNA-1	1
maker-tulip_contig_666_pilon_pilon-augustus-gene-2.21-mRNA-1	1
maker-tulip_contig_230_pilon_pilon-augustus-gene-0.51-mRNA-1	1
augustus_masked-tulip_contig_82_pilon_pilon-processed-gene-1.1-mRNA-1	1
maker-tulip_contig_133_pilon_pilon-augustus-gene-1.26-mRNA-1	1
maker-tulip_contig_839_pilon_pilon-augustus-gene-1.32-mRNA-1	1
maker-tulip_contig_325_pilon_pilon-augustus-gene-0.30-mRNA-1	1
maker-tulip_contig_745_pilon_pilon-augustus-gene-3.6-mRNA-1	1
augustus_masked-tulip_contig_289_pilon_pilon-processed-gene-0.7-mRNA-1	1
maker-tulip_contig_252_pilon_pilon-augustus-gene-0.9-mRNA-1	1
maker-tulip_contig_829_pilon_pilon-augustus-gene-1.51-mRNA-1	1
maker-tulip_contig_516_pilon_pilon-augustus-gene-3.14-mRNA-1	1
maker-tulip_contig_839_pilon_pilon-augustus-gene-1.48-mRNA-1	1
maker-tulip_contig_559_pilon_pilon-augustus-gene-3.16-mRNA-1	1
maker-tulip_contig_112_pilon_pilon-augustus-gene-2.5-mRNA-1	1
maker-tulip_contig_429_pilon_pilon-augustus-gene-0.42-mRNA-1	1
maker-tulip_contig_839_pilon_pilon-augustus-gene-1.50-mRNA-1	1
maker-tulip_contig_81_pilon_pilon-augustus-gene-1.10-mRNA-1	1
augustus_masked-tulip_contig_435_pilon_pilon-processed-gene-0.13-mRNA-1	1
maker-tulip_contig_441_pilon_pilon-augustus-gene-1.184-mRNA-1	1
augustus_masked-tulip_contig_125_pilon_pilon-processed-gene-0.402-mRNA-1	1
augustus_masked-tulip_contig_450_pilon_pilon-processed-gene-1.21-mRNA-1	1
augustus_masked-tulip_contig_829_pilon_pilon-processed-gene-0.24-mRNA-1	1
maker-tulip_contig_339_pilon_pilon-augustus-gene-1.6-mRNA-1	1
maker-tulip_contig_673_pilon_pilon-augustus-gene-0.66-mRNA-1	1
augustus_masked-tulip_contig_133_pilon_pilon-processed-gene-1.19-mRNA-1	1
augustus_masked-tulip_contig_441_pilon_pilon-processed-gene-9.11-mRNA-1	1
augustus_masked-tulip_contig_931_pilon_pilon-processed-gene-1.8-mRNA-1	1
augustus_masked-tulip_contig_167_pilon_pilon-processed-gene-0.3-mRNA-1	1
augustus_masked-tulip_contig_247_pilon_pilon-processed-gene-2.176-mRNA-1	1
augustus_masked-tulip_contig_247_pilon_pilon-processed-gene-2.175-mRNA-1	1
maker-tulip_contig_516_pilon_pilon-augustus-gene-3.56-mRNA-1	1
maker-tulip_contig_167_pilon_pilon-augustus-gene-0.32-mRNA-1	1
maker-tulip_contig_123_pilon_pilon-augustus-gene-0.46-mRNA-1	1
maker-tulip_contig_479_pilon_pilon-augustus-gene-4.11-mRNA-1	1
maker-tulip_contig_666_pilon_pilon-augustus-gene-0.1-mRNA-1	1
maker-tulip_contig_309_pilon_pilon-augustus-gene-0.60-mRNA-1	1
maker-tulip_contig_711_pilon_pilon-augustus-gene-2.35-mRNA-1	1
maker-tulip_contig_33_pilon_pilon-augustus-gene-4.28-mRNA-1	1
maker-tulip_contig_81_pilon_pilon-augustus-gene-1.13-mRNA-1	1
maker-tulip_contig_519_pilon_pilon-augustus-gene-0.1-mRNA-1	1
maker-tulip_contig_334_pilon_pilon-augustus-gene-2.6-mRNA-1	1
maker-tulip_contig_690_pilon_pilon-augustus-gene-4.28-mRNA-1	1
maker-tulip_contig_586_pilon_pilon-augustus-gene-3.9-mRNA-1	1
maker-tulip_contig_474_pilon_pilon-augustus-gene-2.8-mRNA-1	1
maker-tulip_contig_868_pilon_pilon-augustus-gene-0.43-mRNA-1	1
maker-tulip_contig_640_pilon_pilon-augustus-gene-1.27-mRNA-1	1
augustus_masked-tulip_contig_307_pilon_pilon-processed-gene-1.44-mRNA-1	1
maker-tulip_contig_60_pilon_pilon-augustus-gene-0.33-mRNA-1	1
maker-tulip_contig_37_pilon_pilon-augustus-gene-0.24-mRNA-1	1
maker-tulip_contig_781_pilon_pilon-augustus-gene-5.5-mRNA-1	1
maker-tulip_contig_224_pilon_pilon-augustus-gene-2.22-mRNA-1	1
augustus_masked-tulip_contig_110_pilon_pilon-processed-gene-0.24-mRNA-1	1
maker-tulip_contig_125_pilon_pilon-augustus-gene-0.326-mRNA-1	1
maker-tulip_contig_916_pilon_pilon-augustus-gene-2.12-mRNA-1	1
augustus_masked-tulip_contig_718_pilon_pilon-processed-gene-2.22-mRNA-1	1
maker-tulip_contig_360_pilon_pilon-augustus-gene-2.68-mRNA-1	1
maker-tulip_contig_507_pilon_pilon-augustus-gene-0.83-mRNA-1	1
augustus_masked-tulip_contig_796_pilon_pilon-processed-gene-0.2-mRNA-1	1
augustus_masked-tulip_contig_916_pilon_pilon-processed-gene-2.193-mRNA-1	1
maker-tulip_contig_125_pilon_pilon-augustus-gene-0.322-mRNA-1	1
maker-tulip_contig_1_pilon_pilon-augustus-gene-3.9-mRNA-1	1
maker-tulip_contig_192_pilon_pilon-augustus-gene-1.87-mRNA-1	1
maker-tulip_contig_125_pilon_pilon-augustus-gene-0.90-mRNA-1	1
augustus_masked-tulip_contig_447_pilon_pilon-processed-gene-0.1-mRNA-1	1
maker-tulip_contig_640_pilon_pilon-augustus-gene-2.21-mRNA-1	1
maker-tulip_contig_868_pilon_pilon-augustus-gene-0.18-mRNA-1	1
maker-tulip_contig_199_pilon_pilon-augustus-gene-4.95-mRNA-1	1
augustus_masked-tulip_contig_44_pilon_pilon-processed-gene-6.12-mRNA-1	1
augustus_masked-tulip_contig_112_pilon_pilon-processed-gene-2.51-mRNA-1	1
augustus_masked-tulip_contig_112_pilon_pilon-processed-gene-2.57-mRNA-1	1
maker-tulip_contig_56_pilon_pilon-augustus-gene-0.20-mRNA-1	1
maker-tulip_contig_278_pilon_pilon-augustus-gene-0.24-mRNA-1	1
augustus_masked-tulip_contig_407_pilon_pilon-processed-gene-9.16-mRNA-1	1
augustus_masked-tulip_contig_674_pilon_pilon-processed-gene-3.23-mRNA-1	1
maker-tulip_contig_145_pilon_pilon-augustus-gene-1.3-mRNA-1	1
maker-tulip_contig_774_pilon_pilon-augustus-gene-0.100-mRNA-1	1
maker-tulip_contig_3_pilon_pilon-augustus-gene-4.34-mRNA-1	1
maker-tulip_contig_283_pilon_pilon-augustus-gene-1.11-mRNA-1	1
maker-tulip_contig_212_pilon_pilon-augustus-gene-0.21-mRNA-1	1
maker-tulip_contig_360_pilon_pilon-augustus-gene-2.69-mRNA-1	1
maker-tulip_contig_242_pilon_pilon-augustus-gene-0.17-mRNA-1	1
augustus_masked-tulip_contig_378_pilon_pilon-processed-gene-0.3-mRNA-1	1
maker-tulip_contig_586_pilon_pilon-augustus-gene-3.15-mRNA-1	1
augustus_masked-tulip_contig_327_pilon_pilon-processed-gene-10.23-mRNA-1	1
maker-tulip_contig_583_pilon_pilon-augustus-gene-1.24-mRNA-1	1
maker-tulip_contig_586_pilon_pilon-augustus-gene-4.33-mRNA-1	1
maker-tulip_contig_402_pilon_pilon-augustus-gene-2.47-mRNA-1	1
maker-tulip_contig_224_pilon_pilon-augustus-gene-2.44-mRNA-1	1
maker-tulip_contig_519_pilon_pilon-augustus-gene-0.10-mRNA-1	1
maker-tulip_contig_334_pilon_pilon-augustus-gene-3.31-mRNA-1	1
maker-tulip_contig_690_pilon_pilon-augustus-gene-4.27-mRNA-1	1
maker-tulip_contig_109_pilon_pilon-augustus-gene-1.18-mRNA-1	1
maker-tulip_contig_81_pilon_pilon-augustus-gene-2.14-mRNA-1	1
maker-tulip_contig_745_pilon_pilon-augustus-gene-3.8-mRNA-1	1
maker-tulip_contig_31_pilon_pilon-augustus-gene-1.52-mRNA-1	1
augustus_masked-tulip_contig_400_pilon_pilon-processed-gene-0.22-mRNA-1	1
augustus_masked-tulip_contig_474_pilon_pilon-processed-gene-0.127-mRNA-1	1
augustus_masked-tulip_contig_44_pilon_pilon-processed-gene-6.9-mRNA-1	1
augustus_masked-tulip_contig_618_pilon_pilon-processed-gene-0.3-mRNA-1	1
augustus_masked-tulip_contig_15_pilon_pilon-processed-gene-0.15-mRNA-1	1
maker-tulip_contig_130_pilon_pilon-augustus-gene-0.28-mRNA-1	1
maker-tulip_contig_211_pilon_pilon-augustus-gene-4.91-mRNA-1	1
augustus_masked-tulip_contig_44_pilon_pilon-processed-gene-6.11-mRNA-1	1
maker-tulip_contig_687_pilon_pilon-augustus-gene-0.22-mRNA-1	1
maker-tulip_contig_812_pilon_pilon-augustus-gene-2.41-mRNA-1	1
maker-tulip_contig_66_pilon_pilon-augustus-gene-1.16-mRNA-1	1
maker-tulip_contig_702_pilon_pilon-augustus-gene-0.44-mRNA-1	1
augustus_masked-tulip_contig_807_pilon_pilon-processed-gene-0.9-mRNA-1	1
maker-tulip_contig_640_pilon_pilon-augustus-gene-2.8-mRNA-1	1
maker-tulip_contig_711_pilon_pilon-augustus-gene-2.65-mRNA-1	1
maker-tulip_contig_837_pilon_pilon-augustus-gene-7.30-mRNA-1	1
augustus_masked-tulip_contig_339_pilon_pilon-processed-gene-2.18-mRNA-1	1
maker-tulip_contig_610_pilon_pilon-augustus-gene-0.33-mRNA-1	1
maker-tulip_contig_351_pilon_pilon-augustus-gene-1.41-mRNA-1	1
maker-tulip_contig_111_pilon_pilon-augustus-gene-0.47-mRNA-1	1
maker-tulip_contig_567_pilon_pilon-augustus-gene-0.0-mRNA-1	1
maker-tulip_contig_378_pilon_pilon-augustus-gene-3.7-mRNA-1	1
augustus_masked-tulip_contig_224_pilon_pilon-processed-gene-2.18-mRNA-1	1
maker-tulip_contig_407_pilon_pilon-augustus-gene-9.76-mRNA-1	1
augustus_masked-tulip_contig_339_pilon_pilon-processed-gene-0.4-mRNA-1	1
maker-tulip_contig_307_pilon_pilon-augustus-gene-1.170-mRNA-1	1
augustus_masked-tulip_contig_34_pilon_pilon-processed-gene-0.9-mRNA-1	1
maker-tulip_contig_125_pilon_pilon-augustus-gene-0.27-mRNA-1	1
maker-tulip_contig_628_pilon_pilon-augustus-gene-0.4-mRNA-1	1
maker-tulip_contig_360_pilon_pilon-augustus-gene-2.70-mRNA-1	1
augustus_masked-tulip_contig_519_pilon_pilon-processed-gene-0.37-mRNA-1	1
augustus_masked-tulip_contig_407_pilon_pilon-processed-gene-9.39-mRNA-1	1
maker-tulip_contig_287_pilon_pilon-augustus-gene-1.29-mRNA-1	1
augustus_masked-tulip_contig_597_pilon_pilon-processed-gene-3.63-mRNA-1	1
maker-tulip_contig_280_pilon_pilon-augustus-gene-2.19-mRNA-1	1
maker-tulip_contig_687_pilon_pilon-augustus-gene-0.21-mRNA-1	1
augustus_masked-tulip_contig_701_pilon_pilon-processed-gene-0.38-mRNA-1	1
augustus_masked-tulip_contig_148_pilon_pilon-processed-gene-0.54-mRNA-1	1
maker-tulip_contig_839_pilon_pilon-augustus-gene-1.51-mRNA-1	1
augustus_masked-tulip_contig_597_pilon_pilon-processed-gene-3.64-mRNA-1	1
maker-tulip_contig_674_pilon_pilon-augustus-gene-3.13-mRNA-1	1
maker-tulip_contig_701_pilon_pilon-augustus-gene-0.13-mRNA-1	1
maker-tulip_contig_609_pilon_pilon-augustus-gene-0.29-mRNA-1	1
maker-tulip_contig_821_pilon_pilon-augustus-gene-0.5-mRNA-1	1
maker-tulip_contig_228_pilon_pilon-augustus-gene-1.55-mRNA-1	1
maker-tulip_contig_37_pilon_pilon-augustus-gene-1.10-mRNA-1	1
maker-tulip_contig_872_pilon_pilon-augustus-gene-0.83-mRNA-1	1
maker-tulip_contig_916_pilon_pilon-augustus-gene-2.8-mRNA-1	1
maker-tulip_contig_334_pilon_pilon-augustus-gene-3.15-mRNA-1	1
augustus_masked-tulip_contig_654_pilon_pilon-processed-gene-0.0-mRNA-1	1
maker-tulip_contig_837_pilon_pilon-augustus-gene-7.35-mRNA-1	1
maker-tulip_contig_289_pilon_pilon-augustus-gene-0.36-mRNA-1	1
augustus_masked-tulip_contig_446_pilon_pilon-processed-gene-0.30-mRNA-1	1
augustus_masked-tulip_contig_1_pilon_pilon-processed-gene-2.5-mRNA-1	1
maker-tulip_contig_674_pilon_pilon-augustus-gene-9.28-mRNA-1	1
maker-tulip_contig_673_pilon_pilon-augustus-gene-0.100-mRNA-1	1
augustus_masked-tulip_contig_340_pilon_pilon-processed-gene-0.70-mRNA-1	1
maker-tulip_contig_327_pilon_pilon-augustus-gene-7.15-mRNA-1	1
maker-tulip_contig_690_pilon_pilon-augustus-gene-3.57-mRNA-1	1
maker-tulip_contig_331_pilon_pilon-augustus-gene-1.0-mRNA-1	1
augustus_masked-tulip_contig_733_pilon_pilon-processed-gene-0.3-mRNA-1	1
maker-tulip_contig_454_pilon_pilon-augustus-gene-4.2-mRNA-1	1
maker-tulip_contig_218_pilon_pilon-augustus-gene-0.75-mRNA-1	1
maker-tulip_contig_307_pilon_pilon-augustus-gene-1.91-mRNA-1	1
maker-tulip_contig_881_pilon_pilon-augustus-gene-1.33-mRNA-1	1
augustus_masked-tulip_contig_307_pilon_pilon-processed-gene-1.12-mRNA-1	1
maker-tulip_contig_320_pilon_pilon-augustus-gene-3.33-mRNA-1	1
augustus_masked-tulip_contig_407_pilon_pilon-processed-gene-5.14-mRNA-1	1
augustus_masked-tulip_contig_159_pilon_pilon-processed-gene-2.34-mRNA-1	1
augustus_masked-tulip_contig_868_pilon_pilon-processed-gene-0.96-mRNA-1	1
maker-tulip_contig_855_pilon_pilon-augustus-gene-2.15-mRNA-1	1
maker-tulip_contig_662_pilon_pilon-augustus-gene-2.16-mRNA-1	1
maker-tulip_contig_623_pilon_pilon-augustus-gene-4.40-mRNA-1	1
augustus_masked-tulip_contig_671_pilon_pilon-processed-gene-0.5-mRNA-1	1
maker-tulip_contig_667_pilon_pilon-augustus-gene-0.146-mRNA-1	1
maker-tulip_contig_217_pilon_pilon-augustus-gene-0.18-mRNA-1	1
augustus_masked-tulip_contig_479_pilon_pilon-processed-gene-0.61-mRNA-1	1
maker-tulip_contig_194_pilon_pilon-augustus-gene-1.24-mRNA-1	1
maker-tulip_contig_698_pilon_pilon-augustus-gene-1.26-mRNA-1	1
maker-tulip_contig_698_pilon_pilon-augustus-gene-1.25-mRNA-1	1
maker-tulip_contig_420_pilon_pilon-augustus-gene-2.71-mRNA-1	1
augustus_masked-tulip_contig_264_pilon_pilon-processed-gene-0.28-mRNA-1	1
maker-tulip_contig_491_pilon_pilon-augustus-gene-0.22-mRNA-1	1
maker-tulip_contig_490_pilon_pilon-augustus-gene-2.1-mRNA-1	1
augustus_masked-tulip_contig_490_pilon_pilon-processed-gene-2.72-mRNA-1	1
augustus_masked-tulip_contig_706_pilon_pilon-processed-gene-0.101-mRNA-1	1
maker-tulip_contig_807_pilon_pilon-augustus-gene-2.34-mRNA-1	1
maker-tulip_contig_667_pilon_pilon-augustus-gene-0.64-mRNA-1	1
augustus_masked-tulip_contig_567_pilon_pilon-processed-gene-0.19-mRNA-1	1
augustus_masked-tulip_contig_270_pilon_pilon-processed-gene-3.216-mRNA-1	1
maker-tulip_contig_767_pilon_pilon-augustus-gene-0.75-mRNA-1	1
maker-tulip_contig_121_pilon_pilon-augustus-gene-1.18-mRNA-1	1
maker-tulip_contig_3_pilon_pilon-augustus-gene-4.85-mRNA-1	1
maker-tulip_contig_99_pilon_pilon-augustus-gene-0.0-mRNA-1	1
maker-tulip_contig_741_pilon_pilon-augustus-gene-0.25-mRNA-1	1
maker-tulip_contig_241_pilon_pilon-augustus-gene-0.2-mRNA-1	1
maker-tulip_contig_252_pilon_pilon-augustus-gene-0.28-mRNA-1	1
maker-tulip_contig_190_pilon_pilon-augustus-gene-3.2-mRNA-1	1
augustus_masked-tulip_contig_247_pilon_pilon-processed-gene-2.154-mRNA-1	1
augustus_masked-tulip_contig_274_pilon_pilon-processed-gene-0.0-mRNA-1	1
augustus_masked-tulip_contig_37_pilon_pilon-processed-gene-3.5-mRNA-1	1
augustus_masked-tulip_contig_663_pilon_pilon-processed-gene-0.0-mRNA-1	1
augustus_masked-tulip_contig_702_pilon_pilon-processed-gene-0.25-mRNA-1	1
maker-tulip_contig_33_pilon_pilon-augustus-gene-1.48-mRNA-1	1
maker-tulip_contig_674_pilon_pilon-augustus-gene-7.36-mRNA-1	1
augustus_masked-tulip_contig_138_pilon_pilon-processed-gene-0.8-mRNA-1	1
maker-tulip_contig_126_pilon_pilon-augustus-gene-0.6-mRNA-1	1
maker-tulip_contig_482_pilon_pilon-augustus-gene-0.1-mRNA-1	1
maker-tulip_contig_516_pilon_pilon-augustus-gene-3.5-mRNA-1	1
maker-tulip_contig_69_pilon_pilon-augustus-gene-2.30-mRNA-1	1
maker-tulip_contig_69_pilon_pilon-augustus-gene-2.27-mRNA-1	1
maker-tulip_contig_69_pilon_pilon-augustus-gene-2.26-mRNA-1	1
maker-tulip_contig_247_pilon_pilon-augustus-gene-2.69-mRNA-1	1
maker-tulip_contig_66_pilon_pilon-augustus-gene-2.2-mRNA-1	1
maker-tulip_contig_81_pilon_pilon-augustus-gene-1.8-mRNA-1	1
maker-tulip_contig_145_pilon_pilon-augustus-gene-6.27-mRNA-1	1
augustus_masked-tulip_contig_669_pilon_pilon-processed-gene-0.18-mRNA-1	1
maker-tulip_contig_702_pilon_pilon-augustus-gene-0.52-mRNA-1	1
maker-tulip_contig_468_pilon_pilon-augustus-gene-3.16-mRNA-1	1
augustus_masked-tulip_contig_72_pilon_pilon-processed-gene-0.10-mRNA-1	1
maker-tulip_contig_33_pilon_pilon-augustus-gene-2.4-mRNA-1	1
maker-tulip_contig_81_pilon_pilon-augustus-gene-0.72-mRNA-1	1
augustus_masked-tulip_contig_156_pilon_pilon-processed-gene-0.1-mRNA-1	1
maker-tulip_contig_205_pilon_pilon-augustus-gene-0.72-mRNA-1	1
maker-tulip_contig_209_pilon_pilon-augustus-gene-1.59-mRNA-1	1
maker-tulip_contig_697_pilon_pilon-augustus-gene-0.17-mRNA-1	1
augustus_masked-tulip_contig_191_pilon_pilon-processed-gene-0.14-mRNA-1	1
augustus_masked-tulip_contig_148_pilon_pilon-processed-gene-0.66-mRNA-1	1
maker-tulip_contig_375_pilon_pilon-augustus-gene-1.24-mRNA-1	1
maker-tulip_contig_441_pilon_pilon-augustus-gene-9.23-mRNA-1	1
maker-tulip_contig_604_pilon_pilon-augustus-gene-2.8-mRNA-1	1
augustus_masked-tulip_contig_216_pilon_pilon-processed-gene-0.98-mRNA-1	1
maker-tulip_contig_132_pilon_pilon-augustus-gene-1.31-mRNA-1	1
maker-tulip_contig_605_pilon_pilon-augustus-gene-0.68-mRNA-1	1
maker-tulip_contig_216_pilon_pilon-augustus-gene-0.56-mRNA-1	1
augustus_masked-tulip_contig_216_pilon_pilon-processed-gene-0.97-mRNA-1	1
augustus_masked-tulip_contig_322_pilon_pilon-processed-gene-0.42-mRNA-1	1
augustus_masked-tulip_contig_881_pilon_pilon-processed-gene-1.63-mRNA-1	1
maker-tulip_contig_597_pilon_pilon-augustus-gene-4.36-mRNA-1	1
maker-tulip_contig_707_pilon_pilon-augustus-gene-0.67-mRNA-1	1
maker-tulip_contig_31_pilon_pilon-augustus-gene-1.60-mRNA-1	1
maker-tulip_contig_917_pilon_pilon-augustus-gene-0.1-mRNA-1	1
maker-tulip_contig_854_pilon_pilon-augustus-gene-2.28-mRNA-1	1
maker-tulip_contig_931_pilon_pilon-augustus-gene-1.45-mRNA-1	1
maker-tulip_contig_525_pilon_pilon-augustus-gene-2.34-mRNA-1	1
maker-tulip_contig_538_pilon_pilon-augustus-gene-0.52-mRNA-1	1
maker-tulip_contig_468_pilon_pilon-augustus-gene-3.77-mRNA-1	1
maker-tulip_contig_525_pilon_pilon-augustus-gene-2.35-mRNA-1	1
maker-tulip_contig_839_pilon_pilon-augustus-gene-1.27-mRNA-1	1
augustus_masked-tulip_contig_515_pilon_pilon-processed-gene-2.45-mRNA-1	1
augustus_masked-tulip_contig_351_pilon_pilon-processed-gene-1.118-mRNA-1	1
maker-tulip_contig_112_pilon_pilon-augustus-gene-0.4-mRNA-1	1
augustus_masked-tulip_contig_4_pilon_pilon-processed-gene-1.49-mRNA-1	1
maker-tulip_contig_697_pilon_pilon-augustus-gene-2.10-mRNA-1	1
maker-tulip_contig_474_pilon_pilon-augustus-gene-4.68-mRNA-1	1
augustus_masked-tulip_contig_715_pilon_pilon-processed-gene-1.14-mRNA-1	1
maker-tulip_contig_39_pilon_pilon-augustus-gene-0.24-mRNA-1	1
augustus_masked-tulip_contig_636_pilon_pilon-processed-gene-0.15-mRNA-1	1
maker-tulip_contig_248_pilon_pilon-augustus-gene-0.32-mRNA-1	1
maker-tulip_contig_293_pilon_pilon-augustus-gene-0.0-mRNA-1	1
maker-tulip_contig_812_pilon_pilon-augustus-gene-2.44-mRNA-1	1
maker-tulip_contig_284_pilon_pilon-augustus-gene-0.0-mRNA-1	1
maker-tulip_contig_72_pilon_pilon-augustus-gene-1.0-mRNA-1	1
maker-tulip_contig_555_pilon_pilon-augustus-gene-2.53-mRNA-1	1
maker-tulip_contig_110_pilon_pilon-augustus-gene-2.66-mRNA-1	1
augustus_masked-tulip_contig_482_pilon_pilon-processed-gene-2.33-mRNA-1	1
maker-tulip_contig_89_pilon_pilon-augustus-gene-0.30-mRNA-1	1
maker-tulip_contig_515_pilon_pilon-augustus-gene-1.34-mRNA-1	1
maker-tulip_contig_104_pilon_pilon-augustus-gene-0.29-mRNA-1	1
maker-tulip_contig_479_pilon_pilon-augustus-gene-4.20-mRNA-1	1
maker-tulip_contig_704_pilon_pilon-augustus-gene-2.46-mRNA-1	1
maker-tulip_contig_209_pilon_pilon-augustus-gene-2.31-mRNA-1	1
augustus_masked-tulip_contig_867_pilon_pilon-processed-gene-0.35-mRNA-1	1
augustus_masked-tulip_contig_55_pilon_pilon-processed-gene-0.5-mRNA-1	1
augustus_masked-tulip_contig_860_pilon_pilon-processed-gene-6.30-mRNA-1	1
maker-tulip_contig_506_pilon_pilon-augustus-gene-1.165-mRNA-1	1
augustus_masked-tulip_contig_711_pilon_pilon-processed-gene-2.10-mRNA-1	1
maker-tulip_contig_234_pilon_pilon-augustus-gene-5.46-mRNA-1	1
maker-tulip_contig_493_pilon_pilon-augustus-gene-0.6-mRNA-1	1
augustus_masked-tulip_contig_326_pilon_pilon-processed-gene-2.32-mRNA-1	1
augustus_masked-tulip_contig_854_pilon_pilon-processed-gene-2.7-mRNA-1	1
augustus_masked-tulip_contig_441_pilon_pilon-processed-gene-7.2-mRNA-1	1
augustus_masked-tulip_contig_362_pilon_pilon-processed-gene-2.4-mRNA-1	1
maker-tulip_contig_362_pilon_pilon-augustus-gene-2.7-mRNA-1	1
maker-tulip_contig_611_pilon_pilon-augustus-gene-1.12-mRNA-1	1
augustus_masked-tulip_contig_474_pilon_pilon-processed-gene-3.10-mRNA-1	1
maker-tulip_contig_281_pilon_pilon-augustus-gene-5.37-mRNA-1	1
maker-tulip_contig_441_pilon_pilon-augustus-gene-7.12-mRNA-1	1
maker-tulip_contig_482_pilon_pilon-augustus-gene-1.38-mRNA-1	1
maker-tulip_contig_515_pilon_pilon-augustus-gene-5.11-mRNA-1	1
maker-tulip_contig_226_pilon_pilon-augustus-gene-0.1-mRNA-1	1
maker-tulip_contig_34_pilon_pilon-augustus-gene-0.102-mRNA-1	1
augustus_masked-tulip_contig_773_pilon_pilon-processed-gene-2.14-mRNA-1	1
maker-tulip_contig_357_pilon_pilon-augustus-gene-1.39-mRNA-1	1
maker-tulip_contig_218_pilon_pilon-augustus-gene-2.30-mRNA-1	1
maker-tulip_contig_236_pilon_pilon-augustus-gene-4.41-mRNA-1	1
maker-tulip_contig_236_pilon_pilon-augustus-gene-4.95-mRNA-1	1
maker-tulip_contig_436_pilon_pilon-augustus-gene-0.8-mRNA-1	1
augustus_masked-tulip_contig_907_pilon_pilon-processed-gene-2.57-mRNA-1	1
maker-tulip_contig_664_pilon_pilon-augustus-gene-0.6-mRNA-1	1
maker-tulip_contig_362_pilon_pilon-augustus-gene-6.16-mRNA-1	1
maker-tulip_contig_95_pilon_pilon-augustus-gene-0.56-mRNA-1	1
maker-tulip_contig_132_pilon_pilon-augustus-gene-0.7-mRNA-1	1
augustus_masked-tulip_contig_334_pilon_pilon-processed-gene-1.7-mRNA-1	1
maker-tulip_contig_474_pilon_pilon-augustus-gene-5.47-mRNA-1	1
maker-tulip_contig_547_pilon_pilon-augustus-gene-4.0-mRNA-1	1
maker-tulip_contig_603_pilon_pilon-augustus-gene-3.78-mRNA-1	1
maker-tulip_contig_43_pilon_pilon-augustus-gene-3.7-mRNA-1	1
maker-tulip_contig_58_pilon_pilon-augustus-gene-0.49-mRNA-1	1
maker-tulip_contig_632_pilon_pilon-augustus-gene-3.27-mRNA-1	1
maker-tulip_contig_547_pilon_pilon-augustus-gene-0.17-mRNA-1	1
maker-tulip_contig_837_pilon_pilon-augustus-gene-8.59-mRNA-1	1
maker-tulip_contig_843_pilon_pilon-augustus-gene-9.66-mRNA-1	1
maker-tulip_contig_690_pilon_pilon-augustus-gene-1.65-mRNA-1	1
maker-tulip_contig_247_pilon_pilon-augustus-gene-1.47-mRNA-1	1
augustus_masked-tulip_contig_483_pilon_pilon-processed-gene-0.17-mRNA-1	1
maker-tulip_contig_65_pilon_pilon-augustus-gene-0.10-mRNA-1	1
maker-tulip_contig_597_pilon_pilon-augustus-gene-3.27-mRNA-1	1
maker-tulip_contig_831_pilon_pilon-augustus-gene-4.57-mRNA-1	1
maker-tulip_contig_547_pilon_pilon-augustus-gene-6.39-mRNA-1	1
augustus_masked-tulip_contig_547_pilon_pilon-processed-gene-6.6-mRNA-1	1
maker-tulip_contig_192_pilon_pilon-augustus-gene-1.50-mRNA-1	1
maker-tulip_contig_762_pilon_pilon-augustus-gene-0.21-mRNA-1	1
maker-tulip_contig_560_pilon_pilon-augustus-gene-3.18-mRNA-1	1
augustus_masked-tulip_contig_187_pilon_pilon-processed-gene-0.11-mRNA-1	1
maker-tulip_contig_416_pilon_pilon-augustus-gene-0.15-mRNA-1	1
maker-tulip_contig_408_pilon_pilon-augustus-gene-0.30-mRNA-1	1
maker-tulip_contig_916_pilon_pilon-augustus-gene-0.21-mRNA-1	1
maker-tulip_contig_175_pilon_pilon-augustus-gene-1.2-mRNA-1	1
augustus_masked-tulip_contig_705_pilon_pilon-processed-gene-0.23-mRNA-1	1
augustus_masked-tulip_contig_586_pilon_pilon-processed-gene-0.87-mRNA-1	1
maker-tulip_contig_483_pilon_pilon-augustus-gene-0.1-mRNA-1	1
maker-tulip_contig_860_pilon_pilon-augustus-gene-0.18-mRNA-1	1
augustus_masked-tulip_contig_175_pilon_pilon-processed-gene-0.6-mRNA-1	1
maker-tulip_contig_333_pilon_pilon-augustus-gene-3.69-mRNA-1	1
maker-tulip_contig_226_pilon_pilon-augustus-gene-0.2-mRNA-1	1
augustus_masked-tulip_contig_228_pilon_pilon-processed-gene-1.1-mRNA-1	1
maker-tulip_contig_441_pilon_pilon-augustus-gene-3.10-mRNA-1	1
maker-tulip_contig_215_pilon_pilon-augustus-gene-0.5-mRNA-1	1
maker-tulip_contig_159_pilon_pilon-augustus-gene-2.31-mRNA-1	1
maker-tulip_contig_759_pilon_pilon-augustus-gene-1.61-mRNA-1	1
maker-tulip_contig_268_pilon_pilon-augustus-gene-0.12-mRNA-1	1
maker-tulip_contig_271_pilon_pilon-augustus-gene-2.53-mRNA-1	1
augustus_masked-tulip_contig_271_pilon_pilon-processed-gene-0.18-mRNA-1	1
maker-tulip_contig_244_pilon_pilon-augustus-gene-0.42-mRNA-1	1
augustus_masked-tulip_contig_651_pilon_pilon-processed-gene-0.0-mRNA-1	1
maker-tulip_contig_847_pilon_pilon-augustus-gene-0.9-mRNA-1	1
augustus_masked-tulip_contig_812_pilon_pilon-processed-gene-1.7-mRNA-1	1
augustus_masked-tulip_contig_61_pilon_pilon-processed-gene-0.74-mRNA-1	1
maker-tulip_contig_547_pilon_pilon-augustus-gene-0.19-mRNA-1	1
maker-tulip_contig_247_pilon_pilon-augustus-gene-2.118-mRNA-1	1
maker-tulip_contig_550_pilon_pilon-augustus-gene-0.17-mRNA-1	1
maker-tulip_contig_759_pilon_pilon-augustus-gene-1.138-mRNA-1	1
maker-tulip_contig_3_pilon_pilon-augustus-gene-2.19-mRNA-1	1
augustus_masked-tulip_contig_907_pilon_pilon-processed-gene-3.10-mRNA-1	1
maker-tulip_contig_837_pilon_pilon-augustus-gene-5.4-mRNA-1	1
maker-tulip_contig_527_pilon_pilon-augustus-gene-0.40-mRNA-1	1
maker-tulip_contig_424_pilon_pilon-augustus-gene-0.79-mRNA-1	1
maker-tulip_contig_873_pilon_pilon-augustus-gene-0.0-mRNA-1	1
augustus_masked-tulip_contig_669_pilon_pilon-processed-gene-2.25-mRNA-1	1
maker-tulip_contig_86_pilon_pilon-augustus-gene-0.42-mRNA-1	1
maker-tulip_contig_640_pilon_pilon-augustus-gene-0.3-mRNA-1	1
maker-tulip_contig_560_pilon_pilon-augustus-gene-3.19-mRNA-1	1
maker-tulip_contig_907_pilon_pilon-augustus-gene-4.11-mRNA-1	1
maker-tulip_contig_351_pilon_pilon-augustus-gene-1.78-mRNA-1	1
maker-tulip_contig_212_pilon_pilon-augustus-gene-1.88-mRNA-1	1
maker-tulip_contig_244_pilon_pilon-augustus-gene-0.43-mRNA-1	1
maker-tulip_contig_429_pilon_pilon-augustus-gene-3.52-mRNA-1	1
maker-tulip_contig_135_pilon_pilon-augustus-gene-0.0-mRNA-1	1
maker-tulip_contig_247_pilon_pilon-augustus-gene-1.48-mRNA-1	1
maker-tulip_contig_287_pilon_pilon-augustus-gene-0.12-mRNA-1	1
maker-tulip_contig_104_pilon_pilon-augustus-gene-0.27-mRNA-1	1
augustus_masked-tulip_contig_698_pilon_pilon-processed-gene-0.2-mRNA-1	1
maker-tulip_contig_603_pilon_pilon-augustus-gene-2.9-mRNA-1	1
maker-tulip_contig_404_pilon_pilon-augustus-gene-0.0-mRNA-1	1
maker-tulip_contig_133_pilon_pilon-augustus-gene-1.34-mRNA-1	1
maker-tulip_contig_762_pilon_pilon-augustus-gene-0.22-mRNA-1	1
maker-tulip_contig_907_pilon_pilon-augustus-gene-0.27-mRNA-1	1
augustus_masked-tulip_contig_704_pilon_pilon-processed-gene-2.110-mRNA-1	1
maker-tulip_contig_67_pilon_pilon-augustus-gene-0.0-mRNA-1	1
maker-tulip_contig_3_pilon_pilon-augustus-gene-4.87-mRNA-1	1
maker-tulip_contig_581_pilon_pilon-augustus-gene-0.6-mRNA-1	1
augustus_masked-tulip_contig_632_pilon_pilon-processed-gene-3.18-mRNA-1	1
maker-tulip_contig_185_pilon_pilon-augustus-gene-0.20-mRNA-1	1
maker-tulip_contig_323_pilon_pilon-augustus-gene-4.23-mRNA-1	1
augustus_masked-tulip_contig_677_pilon_pilon-processed-gene-0.26-mRNA-1	1
maker-tulip_contig_640_pilon_pilon-augustus-gene-0.6-mRNA-1	1
maker-tulip_contig_102_pilon_pilon-augustus-gene-0.46-mRNA-1	1
augustus_masked-tulip_contig_616_pilon_pilon-processed-gene-2.4-mRNA-1	1
augustus_masked-tulip_contig_633_pilon_pilon-processed-gene-0.21-mRNA-1	1
maker-tulip_contig_345_pilon_pilon-augustus-gene-1.64-mRNA-1	1
maker-tulip_contig_784_pilon_pilon-augustus-gene-0.22-mRNA-1	1
maker-tulip_contig_209_pilon_pilon-augustus-gene-3.41-mRNA-1	1
maker-tulip_contig_721_pilon_pilon-augustus-gene-1.0-mRNA-1	1
augustus_masked-tulip_contig_661_pilon_pilon-processed-gene-1.66-mRNA-1	1
maker-tulip_contig_784_pilon_pilon-augustus-gene-0.23-mRNA-1	1
augustus_masked-tulip_contig_58_pilon_pilon-processed-gene-0.13-mRNA-1	1
maker-tulip_contig_3_pilon_pilon-augustus-gene-6.31-mRNA-1	1
augustus_masked-tulip_contig_52_pilon_pilon-processed-gene-2.14-mRNA-1	1
maker-tulip_contig_479_pilon_pilon-augustus-gene-0.45-mRNA-1	1
maker-tulip_contig_283_pilon_pilon-augustus-gene-1.6-mRNA-1	1
augustus_masked-tulip_contig_800_pilon_pilon-processed-gene-0.14-mRNA-1	1
maker-tulip_contig_280_pilon_pilon-augustus-gene-1.49-mRNA-1	1
maker-tulip_contig_175_pilon_pilon-augustus-gene-1.0-mRNA-1	1
augustus_masked-tulip_contig_546_pilon_pilon-processed-gene-0.69-mRNA-1	1
augustus_masked-tulip_contig_479_pilon_pilon-processed-gene-0.63-mRNA-1	1
augustus_masked-tulip_contig_61_pilon_pilon-processed-gene-0.70-mRNA-1	1
maker-tulip_contig_167_pilon_pilon-augustus-gene-0.47-mRNA-1	1
maker-tulip_contig_121_pilon_pilon-augustus-gene-0.32-mRNA-1	1
maker-tulip_contig_279_pilon_pilon-augustus-gene-2.5-mRNA-1	1
maker-tulip_contig_61_pilon_pilon-augustus-gene-0.10-mRNA-1	1
maker-tulip_contig_175_pilon_pilon-augustus-gene-1.1-mRNA-1	1
augustus_masked-tulip_contig_362_pilon_pilon-processed-gene-6.25-mRNA-1	1
augustus_masked-tulip_contig_559_pilon_pilon-processed-gene-1.3-mRNA-1	1
maker-tulip_contig_455_pilon_pilon-augustus-gene-1.28-mRNA-1	1
augustus_masked-tulip_contig_722_pilon_pilon-processed-gene-0.17-mRNA-1	1
maker-tulip_contig_407_pilon_pilon-augustus-gene-2.30-mRNA-1	1
augustus_masked-tulip_contig_244_pilon_pilon-processed-gene-0.25-mRNA-1	1
maker-tulip_contig_323_pilon_pilon-augustus-gene-3.22-mRNA-1	1
maker-tulip_contig_244_pilon_pilon-augustus-gene-0.32-mRNA-1	1
augustus_masked-tulip_contig_56_pilon_pilon-processed-gene-0.89-mRNA-1	1
maker-tulip_contig_168_pilon_pilon-augustus-gene-1.12-mRNA-1	1
maker-tulip_contig_894_pilon_pilon-augustus-gene-0.3-mRNA-1	1
maker-tulip_contig_271_pilon_pilon-augustus-gene-1.63-mRNA-1	1
maker-tulip_contig_519_pilon_pilon-augustus-gene-0.12-mRNA-1	1
maker-tulip_contig_674_pilon_pilon-augustus-gene-2.17-mRNA-1	1
maker-tulip_contig_412_pilon_pilon-augustus-gene-0.2-mRNA-1	1
maker-tulip_contig_3_pilon_pilon-augustus-gene-1.17-mRNA-1	1
maker-tulip_contig_687_pilon_pilon-augustus-gene-2.1-mRNA-1	1
maker-tulip_contig_2_pilon_pilon-augustus-gene-6.19-mRNA-1	1
augustus_masked-tulip_contig_247_pilon_pilon-processed-gene-2.156-mRNA-1	1
augustus_masked-tulip_contig_425_pilon_pilon-processed-gene-0.11-mRNA-1	1
augustus_masked-tulip_contig_687_pilon_pilon-processed-gene-2.17-mRNA-1	1
augustus_masked-tulip_contig_199_pilon_pilon-processed-gene-6.4-mRNA-1	1
maker-tulip_contig_687_pilon_pilon-augustus-gene-2.2-mRNA-1	1
augustus_masked-tulip_contig_827_pilon_pilon-processed-gene-0.1-mRNA-1	1
maker-tulip_contig_461_pilon_pilon-augustus-gene-0.2-mRNA-1	1
maker-tulip_contig_121_pilon_pilon-augustus-gene-2.7-mRNA-1	1
augustus_masked-tulip_contig_61_pilon_pilon-processed-gene-0.63-mRNA-1	1
augustus_masked-tulip_contig_514_pilon_pilon-processed-gene-1.46-mRNA-1	1
maker-tulip_contig_559_pilon_pilon-augustus-gene-1.9-mRNA-1	1
maker-tulip_contig_845_pilon_pilon-augustus-gene-0.59-mRNA-1	1
maker-tulip_contig_199_pilon_pilon-augustus-gene-5.23-mRNA-1	1
maker-tulip_contig_21_pilon_pilon-augustus-gene-0.2-mRNA-1	1
maker-tulip_contig_916_pilon_pilon-augustus-gene-1.36-mRNA-1	1
augustus_masked-tulip_contig_196_pilon_pilon-processed-gene-4.10-mRNA-1	1
augustus_masked-tulip_contig_37_pilon_pilon-processed-gene-0.7-mRNA-1	1
maker-tulip_contig_33_pilon_pilon-augustus-gene-4.18-mRNA-1	1
maker-tulip_contig_584_pilon_pilon-augustus-gene-3.27-mRNA-1	1
augustus_masked-tulip_contig_495_pilon_pilon-processed-gene-0.14-mRNA-1	1
augustus_masked-tulip_contig_506_pilon_pilon-processed-gene-1.22-mRNA-1	1
maker-tulip_contig_234_pilon_pilon-augustus-gene-1.3-mRNA-1	1
augustus_masked-tulip_contig_702_pilon_pilon-processed-gene-0.22-mRNA-1	1
maker-tulip_contig_316_pilon_pilon-augustus-gene-3.71-mRNA-1	1
maker-tulip_contig_783_pilon_pilon-augustus-gene-0.48-mRNA-1	1
augustus_masked-tulip_contig_690_pilon_pilon-processed-gene-5.18-mRNA-1	1
maker-tulip_contig_44_pilon_pilon-augustus-gene-2.26-mRNA-1	1
maker-tulip_contig_407_pilon_pilon-augustus-gene-1.54-mRNA-1	1
maker-tulip_contig_424_pilon_pilon-augustus-gene-2.32-mRNA-1	1
maker-tulip_contig_339_pilon_pilon-augustus-gene-1.14-mRNA-1	1
augustus_masked-tulip_contig_733_pilon_pilon-processed-gene-0.11-mRNA-1	1
maker-tulip_contig_519_pilon_pilon-augustus-gene-0.28-mRNA-1	1
augustus_masked-tulip_contig_316_pilon_pilon-processed-gene-0.2-mRNA-1	1
maker-tulip_contig_281_pilon_pilon-augustus-gene-2.25-mRNA-1	1
maker-tulip_contig_228_pilon_pilon-augustus-gene-1.31-mRNA-1	1
maker-tulip_contig_362_pilon_pilon-augustus-gene-6.3-mRNA-1	1
maker-tulip_contig_44_pilon_pilon-augustus-gene-6.38-mRNA-1	1
maker-tulip_contig_506_pilon_pilon-augustus-gene-0.17-mRNA-1	1
maker-tulip_contig_555_pilon_pilon-augustus-gene-2.70-mRNA-1	1
maker-tulip_contig_860_pilon_pilon-augustus-gene-3.0-mRNA-1	1
maker-tulip_contig_281_pilon_pilon-augustus-gene-2.0-mRNA-1	1
maker-tulip_contig_623_pilon_pilon-augustus-gene-2.5-mRNA-1	1
maker-tulip_contig_584_pilon_pilon-augustus-gene-1.12-mRNA-1	1
augustus_masked-tulip_contig_715_pilon_pilon-processed-gene-1.13-mRNA-1	1
augustus_masked-tulip_contig_339_pilon_pilon-processed-gene-3.0-mRNA-1	1
maker-tulip_contig_662_pilon_pilon-augustus-gene-2.38-mRNA-1	1
maker-tulip_contig_236_pilon_pilon-augustus-gene-8.43-mRNA-1	1
augustus_masked-tulip_contig_870_pilon_pilon-processed-gene-3.9-mRNA-1	1
maker-tulip_contig_37_pilon_pilon-augustus-gene-3.27-mRNA-1	1
maker-tulip_contig_559_pilon_pilon-augustus-gene-3.13-mRNA-1	1
maker-tulip_contig_506_pilon_pilon-augustus-gene-1.95-mRNA-1	1
maker-tulip_contig_587_pilon_pilon-augustus-gene-0.1-mRNA-1	1
maker-tulip_contig_515_pilon_pilon-augustus-gene-1.33-mRNA-1	1
augustus_masked-tulip_contig_245_pilon_pilon-processed-gene-0.2-mRNA-1	1
augustus_masked-tulip_contig_3_pilon_pilon-processed-gene-4.24-mRNA-1	1
maker-tulip_contig_313_pilon_pilon-augustus-gene-0.14-mRNA-1	1
maker-tulip_contig_388_pilon_pilon-augustus-gene-0.50-mRNA-1	1
augustus_masked-tulip_contig_718_pilon_pilon-processed-gene-1.0-mRNA-1	1
maker-tulip_contig_654_pilon_pilon-augustus-gene-1.69-mRNA-1	1
augustus_masked-tulip_contig_446_pilon_pilon-processed-gene-1.47-mRNA-1	1
maker-tulip_contig_645_pilon_pilon-augustus-gene-2.9-mRNA-1	1
augustus_masked-tulip_contig_604_pilon_pilon-processed-gene-1.1-mRNA-1	1
maker-tulip_contig_327_pilon_pilon-augustus-gene-7.44-mRNA-1	1
maker-tulip_contig_33_pilon_pilon-augustus-gene-4.19-mRNA-1	1
maker-tulip_contig_85_pilon_pilon-augustus-gene-2.6-mRNA-1	1
maker-tulip_contig_733_pilon_pilon-augustus-gene-0.22-mRNA-1	1
maker-tulip_contig_838_pilon_pilon-augustus-gene-0.1-mRNA-1	1
maker-tulip_contig_673_pilon_pilon-augustus-gene-2.5-mRNA-1	1
augustus_masked-tulip_contig_407_pilon_pilon-processed-gene-8.18-mRNA-1	1
maker-tulip_contig_476_pilon_pilon-augustus-gene-0.27-mRNA-1	1
augustus_masked-tulip_contig_313_pilon_pilon-processed-gene-0.5-mRNA-1	1
maker-tulip_contig_515_pilon_pilon-augustus-gene-7.27-mRNA-1	1
augustus_masked-tulip_contig_584_pilon_pilon-processed-gene-0.15-mRNA-1	1
maker-tulip_contig_110_pilon_pilon-augustus-gene-2.17-mRNA-1	1
maker-tulip_contig_547_pilon_pilon-augustus-gene-3.0-mRNA-1	1
maker-tulip_contig_112_pilon_pilon-augustus-gene-0.5-mRNA-1	1
augustus_masked-tulip_contig_32_pilon_pilon-processed-gene-0.1-mRNA-1	1
maker-tulip_contig_827_pilon_pilon-augustus-gene-2.69-mRNA-1	1
maker-tulip_contig_125_pilon_pilon-augustus-gene-0.91-mRNA-1	1
maker-tulip_contig_199_pilon_pilon-augustus-gene-4.71-mRNA-1	1
maker-tulip_contig_345_pilon_pilon-augustus-gene-4.0-mRNA-1	1
maker-tulip_contig_247_pilon_pilon-augustus-gene-2.40-mRNA-1	1
maker-tulip_contig_125_pilon_pilon-augustus-gene-0.92-mRNA-1	1
maker-tulip_contig_603_pilon_pilon-augustus-gene-1.0-mRNA-1	1
maker-tulip_contig_611_pilon_pilon-augustus-gene-3.46-mRNA-1	1
maker-tulip_contig_531_pilon_pilon-augustus-gene-7.19-mRNA-1	1
maker-tulip_contig_831_pilon_pilon-augustus-gene-4.52-mRNA-1	1
augustus_masked-tulip_contig_168_pilon_pilon-processed-gene-1.38-mRNA-1	1
maker-tulip_contig_182_pilon_pilon-augustus-gene-0.8-mRNA-1	1
maker-tulip_contig_809_pilon_pilon-augustus-gene-3.12-mRNA-1	1
maker-tulip_contig_340_pilon_pilon-augustus-gene-0.26-mRNA-1	1
maker-tulip_contig_516_pilon_pilon-augustus-gene-2.31-mRNA-1	1
maker-tulip_contig_44_pilon_pilon-augustus-gene-4.10-mRNA-1	1
maker-tulip_contig_153_pilon_pilon-augustus-gene-1.10-mRNA-1	1
maker-tulip_contig_674_pilon_pilon-augustus-gene-4.0-mRNA-1	1
maker-tulip_contig_473_pilon_pilon-augustus-gene-2.15-mRNA-1	1
maker-tulip_contig_284_pilon_pilon-augustus-gene-1.33-mRNA-1	1
maker-tulip_contig_244_pilon_pilon-augustus-gene-0.33-mRNA-1	1
maker-tulip_contig_175_pilon_pilon-augustus-gene-3.7-mRNA-1	1
augustus_masked-tulip_contig_527_pilon_pilon-processed-gene-3.8-mRNA-1	1
maker-tulip_contig_531_pilon_pilon-augustus-gene-4.25-mRNA-1	1
augustus_masked-tulip_contig_299_pilon_pilon-processed-gene-1.4-mRNA-1	1
maker-tulip_contig_538_pilon_pilon-augustus-gene-0.63-mRNA-1	1
maker-tulip_contig_827_pilon_pilon-augustus-gene-2.66-mRNA-1	1
maker-tulip_contig_407_pilon_pilon-augustus-gene-6.41-mRNA-1	1
maker-tulip_contig_408_pilon_pilon-augustus-gene-0.25-mRNA-1	1
maker-tulip_contig_702_pilon_pilon-augustus-gene-0.48-mRNA-1	1
maker-tulip_contig_538_pilon_pilon-augustus-gene-0.62-mRNA-1	1
augustus_masked-tulip_contig_581_pilon_pilon-processed-gene-4.0-mRNA-1	1
augustus_masked-tulip_contig_611_pilon_pilon-processed-gene-3.10-mRNA-1	1
maker-tulip_contig_407_pilon_pilon-augustus-gene-6.40-mRNA-1	1
maker-tulip_contig_504_pilon_pilon-augustus-gene-3.7-mRNA-1	1
maker-tulip_contig_654_pilon_pilon-augustus-gene-1.68-mRNA-1	1
augustus_masked-tulip_contig_895_pilon_pilon-processed-gene-3.38-mRNA-1	1
maker-tulip_contig_671_pilon_pilon-augustus-gene-0.41-mRNA-1	1
maker-tulip_contig_807_pilon_pilon-augustus-gene-3.36-mRNA-1	1
augustus_masked-tulip_contig_448_pilon_pilon-processed-gene-2.49-mRNA-1	1
maker-tulip_contig_603_pilon_pilon-augustus-gene-3.77-mRNA-1	1
maker-tulip_contig_479_pilon_pilon-augustus-gene-0.8-mRNA-1	1
augustus_masked-tulip_contig_3_pilon_pilon-processed-gene-3.5-mRNA-1	1
maker-tulip_contig_537_pilon_pilon-augustus-gene-0.45-mRNA-1	1
maker-tulip_contig_759_pilon_pilon-augustus-gene-1.140-mRNA-1	1
augustus_masked-tulip_contig_375_pilon_pilon-processed-gene-1.5-mRNA-1	1
maker-tulip_contig_104_pilon_pilon-augustus-gene-0.30-mRNA-1	1
maker-tulip_contig_3_pilon_pilon-augustus-gene-3.32-mRNA-1	1
maker-tulip_contig_327_pilon_pilon-augustus-gene-8.9-mRNA-1	1
augustus_masked-tulip_contig_504_pilon_pilon-processed-gene-0.8-mRNA-1	1
augustus_masked-tulip_contig_586_pilon_pilon-processed-gene-5.14-mRNA-1	1
augustus_masked-tulip_contig_586_pilon_pilon-processed-gene-9.8-mRNA-1	1
maker-tulip_contig_372_pilon_pilon-augustus-gene-2.21-mRNA-1	1
maker-tulip_contig_327_pilon_pilon-augustus-gene-10.66-mRNA-1	1
maker-tulip_contig_120_pilon_pilon-augustus-gene-0.7-mRNA-1	1
maker-tulip_contig_143_pilon_pilon-augustus-gene-0.4-mRNA-1	1
maker-tulip_contig_100_pilon_pilon-augustus-gene-0.6-mRNA-1	1
maker-tulip_contig_121_pilon_pilon-augustus-gene-1.8-mRNA-1	1
maker-tulip_contig_58_pilon_pilon-augustus-gene-4.59-mRNA-1	1
maker-tulip_contig_208_pilon_pilon-augustus-gene-1.124-mRNA-1	1
augustus_masked-tulip_contig_465_pilon_pilon-processed-gene-0.104-mRNA-1	1
maker-tulip_contig_327_pilon_pilon-augustus-gene-10.63-mRNA-1	1
maker-tulip_contig_327_pilon_pilon-augustus-gene-1.27-mRNA-1	1
maker-tulip_contig_218_pilon_pilon-augustus-gene-2.0-mRNA-1	1
augustus_masked-tulip_contig_610_pilon_pilon-processed-gene-2.22-mRNA-1	1
maker-tulip_contig_72_pilon_pilon-augustus-gene-2.22-mRNA-1	1
maker-tulip_contig_69_pilon_pilon-augustus-gene-0.24-mRNA-1	1
maker-tulip_contig_257_pilon_pilon-augustus-gene-0.1-mRNA-1	1
maker-tulip_contig_321_pilon_pilon-augustus-gene-1.41-mRNA-1	1
maker-tulip_contig_126_pilon_pilon-augustus-gene-1.59-mRNA-1	1
maker-tulip_contig_236_pilon_pilon-augustus-gene-2.4-mRNA-1	1
augustus_masked-tulip_contig_843_pilon_pilon-processed-gene-2.13-mRNA-1	1
maker-tulip_contig_52_pilon_pilon-augustus-gene-1.2-mRNA-1	1
maker-tulip_contig_505_pilon_pilon-augustus-gene-3.78-mRNA-1	1
augustus_masked-tulip_contig_855_pilon_pilon-processed-gene-1.1-mRNA-1	1
maker-tulip_contig_150_pilon_pilon-augustus-gene-0.7-mRNA-1	1
maker-tulip_contig_632_pilon_pilon-augustus-gene-3.23-mRNA-1	1
augustus_masked-tulip_contig_860_pilon_pilon-processed-gene-0.5-mRNA-1	1
augustus_masked-tulip_contig_465_pilon_pilon-processed-gene-0.100-mRNA-1	1
maker-tulip_contig_831_pilon_pilon-augustus-gene-0.52-mRNA-1	1
maker-tulip_contig_632_pilon_pilon-augustus-gene-3.36-mRNA-1	1
augustus_masked-tulip_contig_827_pilon_pilon-processed-gene-1.9-mRNA-1	1
maker-tulip_contig_178_pilon_pilon-augustus-gene-0.60-mRNA-1	1
maker-tulip_contig_4_pilon_pilon-augustus-gene-0.3-mRNA-1	1
maker-tulip_contig_547_pilon_pilon-augustus-gene-3.1-mRNA-1	1
maker-tulip_contig_807_pilon_pilon-augustus-gene-3.76-mRNA-1	1
maker-tulip_contig_43_pilon_pilon-augustus-gene-0.30-mRNA-1	1
maker-tulip_contig_623_pilon_pilon-augustus-gene-5.100-mRNA-1	1
maker-tulip_contig_125_pilon_pilon-augustus-gene-0.95-mRNA-1	1
maker-tulip_contig_125_pilon_pilon-augustus-gene-0.94-mRNA-1	1
maker-tulip_contig_85_pilon_pilon-augustus-gene-1.21-mRNA-1	1
augustus_masked-tulip_contig_837_pilon_pilon-processed-gene-0.9-mRNA-1	1
maker-tulip_contig_192_pilon_pilon-augustus-gene-0.2-mRNA-1	1
maker-tulip_contig_307_pilon_pilon-augustus-gene-1.173-mRNA-1	1
maker-tulip_contig_168_pilon_pilon-augustus-gene-1.8-mRNA-1	1
maker-tulip_contig_4_pilon_pilon-augustus-gene-1.16-mRNA-1	1
maker-tulip_contig_809_pilon_pilon-augustus-gene-4.5-mRNA-1	1
maker-tulip_contig_102_pilon_pilon-augustus-gene-0.44-mRNA-1	1
maker-tulip_contig_938_pilon_pilon-augustus-gene-0.0-mRNA-1	1
maker-tulip_contig_694_pilon_pilon-augustus-gene-0.9-mRNA-1	1
augustus_masked-tulip_contig_145_pilon_pilon-processed-gene-4.3-mRNA-1	1
maker-tulip_contig_236_pilon_pilon-augustus-gene-7.96-mRNA-1	1
maker-tulip_contig_130_pilon_pilon-augustus-gene-0.4-mRNA-1	1
maker-tulip_contig_105_pilon_pilon-augustus-gene-0.19-mRNA-1	1
maker-tulip_contig_192_pilon_pilon-augustus-gene-1.183-mRNA-1	1
augustus_masked-tulip_contig_506_pilon_pilon-processed-gene-1.23-mRNA-1	1
maker-tulip_contig_247_pilon_pilon-augustus-gene-2.38-mRNA-1	1
augustus_masked-tulip_contig_420_pilon_pilon-processed-gene-2.27-mRNA-1	1
maker-tulip_contig_707_pilon_pilon-augustus-gene-0.71-mRNA-1	1
augustus_masked-tulip_contig_145_pilon_pilon-processed-gene-5.9-mRNA-1	1
augustus_masked-tulip_contig_454_pilon_pilon-processed-gene-1.5-mRNA-1	1
maker-tulip_contig_693_pilon_pilon-augustus-gene-1.19-mRNA-1	1
maker-tulip_contig_819_pilon_pilon-augustus-gene-2.17-mRNA-1	1
maker-tulip_contig_380_pilon_pilon-augustus-gene-2.11-mRNA-1	1
maker-tulip_contig_473_pilon_pilon-augustus-gene-0.1-mRNA-1	1
maker-tulip_contig_272_pilon_pilon-augustus-gene-5.93-mRNA-1	1
augustus_masked-tulip_contig_674_pilon_pilon-processed-gene-5.11-mRNA-1	1
augustus_masked-tulip_contig_82_pilon_pilon-processed-gene-1.3-mRNA-1	1
maker-tulip_contig_271_pilon_pilon-augustus-gene-2.30-mRNA-1	1
augustus_masked-tulip_contig_131_pilon_pilon-processed-gene-0.4-mRNA-1	1
maker-tulip_contig_323_pilon_pilon-augustus-gene-0.23-mRNA-1	1
maker-tulip_contig_673_pilon_pilon-augustus-gene-0.52-mRNA-1	1
maker-tulip_contig_407_pilon_pilon-augustus-gene-5.30-mRNA-1	1
maker-tulip_contig_507_pilon_pilon-augustus-gene-0.89-mRNA-1	1
augustus_masked-tulip_contig_505_pilon_pilon-processed-gene-1.24-mRNA-1	1
augustus_masked-tulip_contig_362_pilon_pilon-processed-gene-8.35-mRNA-1	1
maker-tulip_contig_4_pilon_pilon-augustus-gene-1.5-mRNA-1	1
maker-tulip_contig_212_pilon_pilon-augustus-gene-1.102-mRNA-1	1
maker-tulip_contig_75_pilon_pilon-augustus-gene-1.5-mRNA-1	1
maker-tulip_contig_628_pilon_pilon-augustus-gene-4.52-mRNA-1	1
augustus_masked-tulip_contig_237_pilon_pilon-processed-gene-0.19-mRNA-1	1
augustus_masked-tulip_contig_778_pilon_pilon-processed-gene-1.32-mRNA-1	1
maker-tulip_contig_701_pilon_pilon-augustus-gene-0.4-mRNA-1	1
augustus_masked-tulip_contig_715_pilon_pilon-processed-gene-5.30-mRNA-1	1
augustus_masked-tulip_contig_555_pilon_pilon-processed-gene-2.109-mRNA-1	1
maker-tulip_contig_479_pilon_pilon-augustus-gene-0.20-mRNA-1	1
augustus_masked-tulip_contig_46_pilon_pilon-processed-gene-0.5-mRNA-1	1
maker-tulip_contig_451_pilon_pilon-augustus-gene-1.31-mRNA-1	1
maker-tulip_contig_907_pilon_pilon-augustus-gene-4.9-mRNA-1	1
maker-tulip_contig_199_pilon_pilon-augustus-gene-3.23-mRNA-1	1
maker-tulip_contig_659_pilon_pilon-augustus-gene-0.9-mRNA-1	1
augustus_masked-tulip_contig_426_pilon_pilon-processed-gene-1.2-mRNA-1	1
maker-tulip_contig_149_pilon_pilon-augustus-gene-0.2-mRNA-1	1
augustus_masked-tulip_contig_362_pilon_pilon-processed-gene-1.9-mRNA-1	1
maker-tulip_contig_490_pilon_pilon-augustus-gene-0.10-mRNA-1	1
maker-tulip_contig_149_pilon_pilon-augustus-gene-0.0-mRNA-1	1
maker-tulip_contig_362_pilon_pilon-augustus-gene-1.32-mRNA-1	1
maker-tulip_contig_870_pilon_pilon-augustus-gene-3.2-mRNA-1	1
augustus_masked-tulip_contig_854_pilon_pilon-processed-gene-1.72-mRNA-1	1
augustus_masked-tulip_contig_855_pilon_pilon-processed-gene-1.16-mRNA-1	1
augustus_masked-tulip_contig_244_pilon_pilon-processed-gene-0.8-mRNA-1	1
maker-tulip_contig_529_pilon_pilon-augustus-gene-1.3-mRNA-1	1
maker-tulip_contig_556_pilon_pilon-augustus-gene-0.7-mRNA-1	1
maker-tulip_contig_247_pilon_pilon-augustus-gene-2.112-mRNA-1	1
augustus_masked-tulip_contig_753_pilon_pilon-processed-gene-1.32-mRNA-1	1
maker-tulip_contig_860_pilon_pilon-augustus-gene-6.22-mRNA-1	1
maker-tulip_contig_490_pilon_pilon-augustus-gene-2.4-mRNA-1	1
maker-tulip_contig_323_pilon_pilon-augustus-gene-2.21-mRNA-1	1
augustus_masked-tulip_contig_327_pilon_pilon-processed-gene-6.26-mRNA-1	1
augustus_masked-tulip_contig_3_pilon_pilon-processed-gene-0.44-mRNA-1	1
maker-tulip_contig_559_pilon_pilon-augustus-gene-2.0-mRNA-1	1
augustus_masked-tulip_contig_327_pilon_pilon-processed-gene-6.25-mRNA-1	1
augustus_masked-tulip_contig_318_pilon_pilon-processed-gene-0.76-mRNA-1	1
maker-tulip_contig_560_pilon_pilon-augustus-gene-0.39-mRNA-1	1
maker-tulip_contig_159_pilon_pilon-augustus-gene-1.0-mRNA-1	1
augustus_masked-tulip_contig_145_pilon_pilon-processed-gene-1.14-mRNA-1	1
augustus_masked-tulip_contig_252_pilon_pilon-processed-gene-0.36-mRNA-1	1
maker-tulip_contig_121_pilon_pilon-augustus-gene-0.35-mRNA-1	1
maker-tulip_contig_503_pilon_pilon-augustus-gene-1.41-mRNA-1	1
maker-tulip_contig_610_pilon_pilon-augustus-gene-1.29-mRNA-1	1
maker-tulip_contig_610_pilon_pilon-augustus-gene-1.28-mRNA-1	1
maker-tulip_contig_881_pilon_pilon-augustus-gene-1.1-mRNA-1	1
augustus_masked-tulip_contig_662_pilon_pilon-processed-gene-0.2-mRNA-1	1
maker-tulip_contig_79_pilon_pilon-augustus-gene-0.10-mRNA-1	1
maker-tulip_contig_705_pilon_pilon-augustus-gene-0.4-mRNA-1	1
augustus_masked-tulip_contig_126_pilon_pilon-processed-gene-0.47-mRNA-1	1
maker-tulip_contig_182_pilon_pilon-augustus-gene-1.59-mRNA-1	1
maker-tulip_contig_806_pilon_pilon-augustus-gene-2.29-mRNA-1	1
augustus_masked-tulip_contig_474_pilon_pilon-processed-gene-5.10-mRNA-1	1
maker-tulip_contig_839_pilon_pilon-augustus-gene-1.49-mRNA-1	1
maker-tulip_contig_414_pilon_pilon-augustus-gene-0.18-mRNA-1	1
augustus_masked-tulip_contig_86_pilon_pilon-processed-gene-1.31-mRNA-1	1
maker-tulip_contig_926_pilon_pilon-augustus-gene-0.26-mRNA-1	1
maker-tulip_contig_362_pilon_pilon-augustus-gene-7.22-mRNA-1	1
maker-tulip_contig_334_pilon_pilon-augustus-gene-4.66-mRNA-1	1
maker-tulip_contig_710_pilon_pilon-augustus-gene-0.88-mRNA-1	1
augustus_masked-tulip_contig_303_pilon_pilon-processed-gene-0.3-mRNA-1	1
maker-tulip_contig_303_pilon_pilon-augustus-gene-0.29-mRNA-1	1
maker-tulip_contig_61_pilon_pilon-augustus-gene-0.2-mRNA-1	1
maker-tulip_contig_806_pilon_pilon-augustus-gene-0.6-mRNA-1	1
maker-tulip_contig_2_pilon_pilon-augustus-gene-7.2-mRNA-1	1
maker-tulip_contig_407_pilon_pilon-augustus-gene-0.71-mRNA-1	1
maker-tulip_contig_781_pilon_pilon-augustus-gene-6.45-mRNA-1	1
maker-tulip_contig_323_pilon_pilon-augustus-gene-6.26-mRNA-1	1
maker-tulip_contig_236_pilon_pilon-augustus-gene-8.40-mRNA-1	1
augustus_masked-tulip_contig_394_pilon_pilon-processed-gene-1.34-mRNA-1	1
maker-tulip_contig_843_pilon_pilon-augustus-gene-7.13-mRNA-1	1
augustus_masked-tulip_contig_327_pilon_pilon-processed-gene-2.6-mRNA-1	1
maker-tulip_contig_4_pilon_pilon-augustus-gene-0.5-mRNA-1	1
augustus_masked-tulip_contig_272_pilon_pilon-processed-gene-4.72-mRNA-1	1
maker-tulip_contig_392_pilon_pilon-augustus-gene-0.19-mRNA-1	1
maker-tulip_contig_454_pilon_pilon-augustus-gene-1.12-mRNA-1	1
maker-tulip_contig_584_pilon_pilon-augustus-gene-0.5-mRNA-1	1
maker-tulip_contig_674_pilon_pilon-augustus-gene-9.25-mRNA-1	1
maker-tulip_contig_318_pilon_pilon-augustus-gene-3.23-mRNA-1	1
augustus_masked-tulip_contig_272_pilon_pilon-processed-gene-4.77-mRNA-1	1
maker-tulip_contig_147_pilon_pilon-augustus-gene-0.45-mRNA-1	1
augustus_masked-tulip_contig_281_pilon_pilon-processed-gene-5.39-mRNA-1	1
augustus_masked-tulip_contig_609_pilon_pilon-processed-gene-0.0-mRNA-1	1
maker-tulip_contig_916_pilon_pilon-augustus-gene-2.0-mRNA-1	1
maker-tulip_contig_346_pilon_pilon-augustus-gene-0.14-mRNA-1	1
maker-tulip_contig_527_pilon_pilon-augustus-gene-0.33-mRNA-1	1
maker-tulip_contig_168_pilon_pilon-augustus-gene-0.10-mRNA-1	1
augustus_masked-tulip_contig_934_pilon_pilon-processed-gene-0.25-mRNA-1	1
augustus_masked-tulip_contig_80_pilon_pilon-processed-gene-0.26-mRNA-1	1
augustus_masked-tulip_contig_669_pilon_pilon-processed-gene-1.12-mRNA-1	1
maker-tulip_contig_289_pilon_pilon-augustus-gene-0.47-mRNA-1	1
maker-tulip_contig_69_pilon_pilon-augustus-gene-1.21-mRNA-1	1
augustus_masked-tulip_contig_514_pilon_pilon-processed-gene-1.65-mRNA-1	1
augustus_masked-tulip_contig_161_pilon_pilon-processed-gene-0.21-mRNA-1	1
augustus_masked-tulip_contig_407_pilon_pilon-processed-gene-5.19-mRNA-1	1
maker-tulip_contig_837_pilon_pilon-augustus-gene-7.61-mRNA-1	1
maker-tulip_contig_212_pilon_pilon-augustus-gene-1.117-mRNA-1	1
maker-tulip_contig_738_pilon_pilon-augustus-gene-0.10-mRNA-1	1
maker-tulip_contig_691_pilon_pilon-augustus-gene-2.85-mRNA-1	1
maker-tulip_contig_381_pilon_pilon-augustus-gene-0.100-mRNA-1	1
maker-tulip_contig_604_pilon_pilon-augustus-gene-3.29-mRNA-1	1
augustus_masked-tulip_contig_938_pilon_pilon-processed-gene-0.9-mRNA-1	1
maker-tulip_contig_560_pilon_pilon-augustus-gene-2.29-mRNA-1	1
maker-tulip_contig_519_pilon_pilon-augustus-gene-2.54-mRNA-1	1
maker-tulip_contig_392_pilon_pilon-augustus-gene-0.34-mRNA-1	1
maker-tulip_contig_558_pilon_pilon-augustus-gene-0.3-mRNA-1	1
maker-tulip_contig_774_pilon_pilon-augustus-gene-0.139-mRNA-1	1
maker-tulip_contig_2_pilon_pilon-augustus-gene-8.25-mRNA-1	1
maker-tulip_contig_441_pilon_pilon-augustus-gene-9.27-mRNA-1	1
maker-tulip_contig_236_pilon_pilon-augustus-gene-7.59-mRNA-1	1
maker-tulip_contig_773_pilon_pilon-augustus-gene-3.35-mRNA-1	1
maker-tulip_contig_318_pilon_pilon-augustus-gene-3.9-mRNA-1	1
maker-tulip_contig_745_pilon_pilon-augustus-gene-1.35-mRNA-1	1
maker-tulip_contig_468_pilon_pilon-augustus-gene-3.56-mRNA-1	1
maker-tulip_contig_247_pilon_pilon-augustus-gene-2.116-mRNA-1	1
maker-tulip_contig_479_pilon_pilon-augustus-gene-1.30-mRNA-1	1
maker-tulip_contig_103_pilon_pilon-augustus-gene-0.14-mRNA-1	1
augustus_masked-tulip_contig_190_pilon_pilon-processed-gene-2.39-mRNA-1	1
maker-tulip_contig_934_pilon_pilon-augustus-gene-0.14-mRNA-1	1
augustus_masked-tulip_contig_198_pilon_pilon-processed-gene-1.9-mRNA-1	1
maker-tulip_contig_110_pilon_pilon-augustus-gene-3.24-mRNA-1	1
maker-tulip_contig_145_pilon_pilon-augustus-gene-6.12-mRNA-1	1
maker-tulip_contig_327_pilon_pilon-augustus-gene-10.51-mRNA-1	1
maker-tulip_contig_318_pilon_pilon-augustus-gene-0.34-mRNA-1	1
maker-tulip_contig_195_pilon_pilon-augustus-gene-0.43-mRNA-1	1
maker-tulip_contig_113_pilon_pilon-augustus-gene-0.35-mRNA-1	1
maker-tulip_contig_55_pilon_pilon-augustus-gene-0.64-mRNA-1	1
maker-tulip_contig_33_pilon_pilon-augustus-gene-3.58-mRNA-1	1
maker-tulip_contig_392_pilon_pilon-augustus-gene-0.22-mRNA-1	1
augustus_masked-tulip_contig_515_pilon_pilon-processed-gene-1.25-mRNA-1	1
maker-tulip_contig_862_pilon_pilon-augustus-gene-1.57-mRNA-1	1
maker-tulip_contig_707_pilon_pilon-augustus-gene-0.5-mRNA-1	1
maker-tulip_contig_44_pilon_pilon-augustus-gene-2.27-mRNA-1	1
maker-tulip_contig_74_pilon_pilon-augustus-gene-0.48-mRNA-1	1
augustus_masked-tulip_contig_477_pilon_pilon-processed-gene-0.18-mRNA-1	1
maker-tulip_contig_196_pilon_pilon-augustus-gene-2.8-mRNA-1	1
maker-tulip_contig_429_pilon_pilon-augustus-gene-1.4-mRNA-1	1
maker-tulip_contig_515_pilon_pilon-augustus-gene-5.5-mRNA-1	1
maker-tulip_contig_316_pilon_pilon-augustus-gene-2.6-mRNA-1	1
augustus_masked-tulip_contig_680_pilon_pilon-processed-gene-0.18-mRNA-1	1
maker-tulip_contig_698_pilon_pilon-augustus-gene-3.9-mRNA-1	1
augustus_masked-tulip_contig_798_pilon_pilon-processed-gene-0.10-mRNA-1	1
augustus_masked-tulip_contig_842_pilon_pilon-processed-gene-0.94-mRNA-1	1
maker-tulip_contig_360_pilon_pilon-augustus-gene-2.80-mRNA-1	1
maker-tulip_contig_54_pilon_pilon-augustus-gene-1.13-mRNA-1	1
maker-tulip_contig_762_pilon_pilon-augustus-gene-0.16-mRNA-1	1
maker-tulip_contig_407_pilon_pilon-augustus-gene-0.64-mRNA-1	1
maker-tulip_contig_474_pilon_pilon-augustus-gene-6.7-mRNA-1	1
augustus_masked-tulip_contig_101_pilon_pilon-processed-gene-0.3-mRNA-1	1
augustus_masked-tulip_contig_35_pilon_pilon-processed-gene-0.133-mRNA-1	1
maker-tulip_contig_333_pilon_pilon-augustus-gene-3.119-mRNA-1	1
maker-tulip_contig_356_pilon_pilon-augustus-gene-1.44-mRNA-1	1
maker-tulip_contig_711_pilon_pilon-augustus-gene-1.20-mRNA-1	1
maker-tulip_contig_42_pilon_pilon-augustus-gene-1.2-mRNA-1	1
augustus_masked-tulip_contig_673_pilon_pilon-processed-gene-1.4-mRNA-1	1
maker-tulip_contig_58_pilon_pilon-augustus-gene-5.24-mRNA-1	1
augustus_masked-tulip_contig_693_pilon_pilon-processed-gene-2.13-mRNA-1	1
maker-tulip_contig_168_pilon_pilon-augustus-gene-1.5-mRNA-1	1
augustus_masked-tulip_contig_474_pilon_pilon-processed-gene-1.80-mRNA-1	1
maker-tulip_contig_673_pilon_pilon-augustus-gene-1.67-mRNA-1	1
maker-tulip_contig_745_pilon_pilon-augustus-gene-2.3-mRNA-1	1
maker-tulip_contig_566_pilon_pilon-augustus-gene-0.2-mRNA-1	1
maker-tulip_contig_668_pilon_pilon-augustus-gene-1.0-mRNA-1	1
augustus_masked-tulip_contig_909_pilon_pilon-processed-gene-0.1-mRNA-1	1
maker-tulip_contig_673_pilon_pilon-augustus-gene-1.22-mRNA-1	1
augustus_masked-tulip_contig_46_pilon_pilon-processed-gene-2.14-mRNA-1	1
maker-tulip_contig_531_pilon_pilon-augustus-gene-4.28-mRNA-1	1
augustus_masked-tulip_contig_597_pilon_pilon-processed-gene-2.11-mRNA-1	1
maker-tulip_contig_516_pilon_pilon-augustus-gene-3.45-mRNA-1	1
maker-tulip_contig_102_pilon_pilon-augustus-gene-0.39-mRNA-1	1
maker-tulip_contig_507_pilon_pilon-augustus-gene-2.26-mRNA-1	1
augustus_masked-tulip_contig_58_pilon_pilon-processed-gene-2.6-mRNA-1	1
augustus_masked-tulip_contig_603_pilon_pilon-processed-gene-4.51-mRNA-1	1
maker-tulip_contig_704_pilon_pilon-augustus-gene-1.7-mRNA-1	1
maker-tulip_contig_110_pilon_pilon-augustus-gene-3.17-mRNA-1	1
augustus_masked-tulip_contig_85_pilon_pilon-processed-gene-1.12-mRNA-1	1
augustus_masked-tulip_contig_339_pilon_pilon-processed-gene-3.5-mRNA-1	1
maker-tulip_contig_208_pilon_pilon-augustus-gene-1.82-mRNA-1	1
maker-tulip_contig_44_pilon_pilon-augustus-gene-3.19-mRNA-1	1
maker-tulip_contig_407_pilon_pilon-augustus-gene-9.43-mRNA-1	1
maker-tulip_contig_43_pilon_pilon-augustus-gene-5.7-mRNA-1	1
maker-tulip_contig_523_pilon_pilon-augustus-gene-0.108-mRNA-1	1
augustus_masked-tulip_contig_55_pilon_pilon-processed-gene-0.10-mRNA-1	1
augustus_masked-tulip_contig_468_pilon_pilon-processed-gene-3.112-mRNA-1	1
maker-tulip_contig_276_pilon_pilon-augustus-gene-3.2-mRNA-1	1
augustus_masked-tulip_contig_777_pilon_pilon-processed-gene-0.20-mRNA-1	1
augustus_masked-tulip_contig_360_pilon_pilon-processed-gene-2.103-mRNA-1	1
maker-tulip_contig_482_pilon_pilon-augustus-gene-2.10-mRNA-1	1
maker-tulip_contig_655_pilon_pilon-augustus-gene-0.28-mRNA-1	1
augustus_masked-tulip_contig_468_pilon_pilon-processed-gene-2.47-mRNA-1	1
maker-tulip_contig_360_pilon_pilon-augustus-gene-2.65-mRNA-1	1
augustus_masked-tulip_contig_85_pilon_pilon-processed-gene-1.14-mRNA-1	1
maker-tulip_contig_626_pilon_pilon-augustus-gene-1.55-mRNA-1	1
augustus_masked-tulip_contig_529_pilon_pilon-processed-gene-1.55-mRNA-1	1
maker-tulip_contig_45_pilon_pilon-augustus-gene-0.19-mRNA-1	1
augustus_masked-tulip_contig_407_pilon_pilon-processed-gene-3.68-mRNA-1	1
augustus_masked-tulip_contig_529_pilon_pilon-processed-gene-1.74-mRNA-1	1
maker-tulip_contig_597_pilon_pilon-augustus-gene-0.11-mRNA-1	1
maker-tulip_contig_323_pilon_pilon-augustus-gene-7.14-mRNA-1	1
augustus_masked-tulip_contig_586_pilon_pilon-processed-gene-4.71-mRNA-1	1
maker-tulip_contig_272_pilon_pilon-augustus-gene-4.11-mRNA-1	1
augustus_masked-tulip_contig_420_pilon_pilon-processed-gene-2.13-mRNA-1	1
augustus_masked-tulip_contig_454_pilon_pilon-processed-gene-0.2-mRNA-1	1
augustus_masked-tulip_contig_357_pilon_pilon-processed-gene-0.10-mRNA-1	1
maker-tulip_contig_521_pilon_pilon-augustus-gene-0.1-mRNA-1	1
maker-tulip_contig_110_pilon_pilon-augustus-gene-0.12-mRNA-1	1
augustus_masked-tulip_contig_37_pilon_pilon-processed-gene-0.0-mRNA-1	1
augustus_masked-tulip_contig_454_pilon_pilon-processed-gene-0.1-mRNA-1	1
augustus_masked-tulip_contig_773_pilon_pilon-processed-gene-1.6-mRNA-1	1
maker-tulip_contig_474_pilon_pilon-augustus-gene-0.84-mRNA-1	1
maker-tulip_contig_697_pilon_pilon-augustus-gene-1.22-mRNA-1	1
maker-tulip_contig_270_pilon_pilon-augustus-gene-1.9-mRNA-1	1
maker-tulip_contig_817_pilon_pilon-augustus-gene-0.1-mRNA-1	1
maker-tulip_contig_309_pilon_pilon-augustus-gene-0.27-mRNA-1	1
maker-tulip_contig_3_pilon_pilon-augustus-gene-5.18-mRNA-1	1
augustus_masked-tulip_contig_716_pilon_pilon-processed-gene-0.5-mRNA-1	1
maker-tulip_contig_303_pilon_pilon-augustus-gene-1.65-mRNA-1	1
maker-tulip_contig_81_pilon_pilon-augustus-gene-0.33-mRNA-1	1
maker-tulip_contig_800_pilon_pilon-augustus-gene-1.21-mRNA-1	1
maker-tulip_contig_264_pilon_pilon-augustus-gene-0.10-mRNA-1	1
maker-tulip_contig_626_pilon_pilon-augustus-gene-1.35-mRNA-1	1
augustus_masked-tulip_contig_490_pilon_pilon-processed-gene-2.82-mRNA-1	1
maker-tulip_contig_417_pilon_pilon-augustus-gene-1.9-mRNA-1	1
maker-tulip_contig_715_pilon_pilon-augustus-gene-5.60-mRNA-1	1
maker-tulip_contig_59_pilon_pilon-augustus-gene-2.42-mRNA-1	1
maker-tulip_contig_147_pilon_pilon-augustus-gene-1.36-mRNA-1	1
maker-tulip_contig_312_pilon_pilon-augustus-gene-0.12-mRNA-1	1
maker-tulip_contig_781_pilon_pilon-augustus-gene-1.44-mRNA-1	1
maker-tulip_contig_603_pilon_pilon-augustus-gene-1.1-mRNA-1	1
maker-tulip_contig_123_pilon_pilon-augustus-gene-0.72-mRNA-1	1
maker-tulip_contig_827_pilon_pilon-augustus-gene-2.64-mRNA-1	1
maker-tulip_contig_691_pilon_pilon-augustus-gene-1.6-mRNA-1	1
maker-tulip_contig_1_pilon_pilon-augustus-gene-5.35-mRNA-1	1
augustus_masked-tulip_contig_199_pilon_pilon-processed-gene-5.33-mRNA-1	1
maker-tulip_contig_690_pilon_pilon-augustus-gene-0.27-mRNA-1	1
maker-tulip_contig_46_pilon_pilon-augustus-gene-0.26-mRNA-1	1
maker-tulip_contig_237_pilon_pilon-augustus-gene-0.27-mRNA-1	1
maker-tulip_contig_531_pilon_pilon-augustus-gene-0.48-mRNA-1	1
augustus_masked-tulip_contig_146_pilon_pilon-processed-gene-0.34-mRNA-1	1
maker-tulip_contig_566_pilon_pilon-augustus-gene-0.4-mRNA-1	1
maker-tulip_contig_674_pilon_pilon-augustus-gene-0.15-mRNA-1	1
maker-tulip_contig_3_pilon_pilon-augustus-gene-0.12-mRNA-1	1
maker-tulip_contig_490_pilon_pilon-augustus-gene-2.39-mRNA-1	1
augustus_masked-tulip_contig_401_pilon_pilon-processed-gene-0.9-mRNA-1	1
maker-tulip_contig_784_pilon_pilon-augustus-gene-0.6-mRNA-1	1
maker-tulip_contig_381_pilon_pilon-augustus-gene-0.113-mRNA-1	1
augustus_masked-tulip_contig_626_pilon_pilon-processed-gene-1.1-mRNA-1	1
augustus_masked-tulip_contig_211_pilon_pilon-processed-gene-1.9-mRNA-1	1
augustus_masked-tulip_contig_697_pilon_pilon-processed-gene-2.16-mRNA-1	1
maker-tulip_contig_272_pilon_pilon-augustus-gene-5.55-mRNA-1	1
maker-tulip_contig_320_pilon_pilon-augustus-gene-1.2-mRNA-1	1
maker-tulip_contig_211_pilon_pilon-augustus-gene-2.0-mRNA-1	1
maker-tulip_contig_236_pilon_pilon-augustus-gene-1.8-mRNA-1	1
maker-tulip_contig_870_pilon_pilon-augustus-gene-0.1-mRNA-1	1
maker-tulip_contig_441_pilon_pilon-augustus-gene-4.20-mRNA-1	1
maker-tulip_contig_491_pilon_pilon-augustus-gene-0.25-mRNA-1	1
maker-tulip_contig_31_pilon_pilon-augustus-gene-0.9-mRNA-1	1
maker-tulip_contig_281_pilon_pilon-augustus-gene-5.11-mRNA-1	1
maker-tulip_contig_78_pilon_pilon-augustus-gene-0.99-mRNA-1	1
maker-tulip_contig_818_pilon_pilon-augustus-gene-0.72-mRNA-1	1
maker-tulip_contig_416_pilon_pilon-augustus-gene-0.61-mRNA-1	1
maker-tulip_contig_909_pilon_pilon-augustus-gene-0.42-mRNA-1	1
augustus_masked-tulip_contig_343_pilon_pilon-processed-gene-0.89-mRNA-1	1
maker-tulip_contig_320_pilon_pilon-augustus-gene-0.12-mRNA-1	1
maker-tulip_contig_527_pilon_pilon-augustus-gene-1.31-mRNA-1	1
augustus_masked-tulip_contig_773_pilon_pilon-processed-gene-2.19-mRNA-1	1
maker-tulip_contig_640_pilon_pilon-augustus-gene-1.24-mRNA-1	1
maker-tulip_contig_907_pilon_pilon-augustus-gene-0.17-mRNA-1	1
maker-tulip_contig_289_pilon_pilon-augustus-gene-0.42-mRNA-1	1
augustus_masked-tulip_contig_29_pilon_pilon-processed-gene-1.4-mRNA-1	1
augustus_masked-tulip_contig_546_pilon_pilon-processed-gene-0.61-mRNA-1	1
maker-tulip_contig_662_pilon_pilon-augustus-gene-2.43-mRNA-1	1
maker-tulip_contig_2_pilon_pilon-augustus-gene-1.0-mRNA-1	1
maker-tulip_contig_236_pilon_pilon-augustus-gene-4.104-mRNA-1	1
maker-tulip_contig_126_pilon_pilon-augustus-gene-2.28-mRNA-1	1
maker-tulip_contig_196_pilon_pilon-augustus-gene-4.42-mRNA-1	1
maker-tulip_contig_907_pilon_pilon-augustus-gene-3.23-mRNA-1	1
maker-tulip_contig_44_pilon_pilon-augustus-gene-7.46-mRNA-1	1
augustus_masked-tulip_contig_715_pilon_pilon-processed-gene-4.9-mRNA-1	1
maker-tulip_contig_828_pilon_pilon-augustus-gene-0.5-mRNA-1	1
augustus_masked-tulip_contig_455_pilon_pilon-processed-gene-0.19-mRNA-1	1
maker-tulip_contig_121_pilon_pilon-augustus-gene-0.27-mRNA-1	1
maker-tulip_contig_29_pilon_pilon-augustus-gene-1.34-mRNA-1	1
augustus_masked-tulip_contig_610_pilon_pilon-processed-gene-1.65-mRNA-1	1
maker-tulip_contig_852_pilon_pilon-augustus-gene-0.23-mRNA-1	1
augustus_masked-tulip_contig_767_pilon_pilon-processed-gene-0.12-mRNA-1	1
maker-tulip_contig_86_pilon_pilon-augustus-gene-1.10-mRNA-1	1
maker-tulip_contig_333_pilon_pilon-augustus-gene-1.0-mRNA-1	1
augustus_masked-tulip_contig_881_pilon_pilon-processed-gene-1.66-mRNA-1	1
augustus_masked-tulip_contig_343_pilon_pilon-processed-gene-0.82-mRNA-1	1
maker-tulip_contig_157_pilon_pilon-augustus-gene-0.24-mRNA-1	1
maker-tulip_contig_870_pilon_pilon-augustus-gene-4.31-mRNA-1	1
maker-tulip_contig_236_pilon_pilon-augustus-gene-7.58-mRNA-1	1
maker-tulip_contig_800_pilon_pilon-augustus-gene-1.67-mRNA-1	1
maker-tulip_contig_677_pilon_pilon-augustus-gene-0.22-mRNA-1	1
maker-tulip_contig_651_pilon_pilon-augustus-gene-0.27-mRNA-1	1
maker-tulip_contig_130_pilon_pilon-augustus-gene-0.7-mRNA-1	1
maker-tulip_contig_168_pilon_pilon-augustus-gene-0.76-mRNA-1	1
maker-tulip_contig_54_pilon_pilon-augustus-gene-1.11-mRNA-1	1
maker-tulip_contig_916_pilon_pilon-augustus-gene-0.4-mRNA-1	1
maker-tulip_contig_324_pilon_pilon-augustus-gene-0.9-mRNA-1	1
maker-tulip_contig_482_pilon_pilon-augustus-gene-1.30-mRNA-1	1
maker-tulip_contig_327_pilon_pilon-augustus-gene-6.6-mRNA-1	1
augustus_masked-tulip_contig_843_pilon_pilon-processed-gene-3.2-mRNA-1	1
maker-tulip_contig_338_pilon_pilon-augustus-gene-0.39-mRNA-1	1
maker-tulip_contig_605_pilon_pilon-augustus-gene-0.45-mRNA-1	1
maker-tulip_contig_473_pilon_pilon-augustus-gene-1.32-mRNA-1	1
augustus_masked-tulip_contig_254_pilon_pilon-processed-gene-0.36-mRNA-1	1
augustus_masked-tulip_contig_45_pilon_pilon-processed-gene-0.3-mRNA-1	1
augustus_masked-tulip_contig_505_pilon_pilon-processed-gene-2.3-mRNA-1	1
maker-tulip_contig_279_pilon_pilon-augustus-gene-0.7-mRNA-1	1
maker-tulip_contig_290_pilon_pilon-augustus-gene-5.5-mRNA-1	1
maker-tulip_contig_464_pilon_pilon-augustus-gene-0.11-mRNA-1	1
maker-tulip_contig_623_pilon_pilon-augustus-gene-5.112-mRNA-1	1
maker-tulip_contig_515_pilon_pilon-augustus-gene-5.1-mRNA-1	1
augustus_masked-tulip_contig_745_pilon_pilon-processed-gene-1.4-mRNA-1	1
maker-tulip_contig_46_pilon_pilon-augustus-gene-2.19-mRNA-1	1
maker-tulip_contig_429_pilon_pilon-augustus-gene-2.9-mRNA-1	1
maker-tulip_contig_54_pilon_pilon-augustus-gene-0.18-mRNA-1	1
maker-tulip_contig_586_pilon_pilon-augustus-gene-5.38-mRNA-1	1
maker-tulip_contig_109_pilon_pilon-augustus-gene-1.2-mRNA-1	1
maker-tulip_contig_216_pilon_pilon-augustus-gene-0.45-mRNA-1	1
maker-tulip_contig_611_pilon_pilon-augustus-gene-2.2-mRNA-1	1
augustus_masked-tulip_contig_77_pilon_pilon-processed-gene-1.5-mRNA-1	1
augustus_masked-tulip_contig_271_pilon_pilon-processed-gene-0.12-mRNA-1	1
augustus_masked-tulip_contig_248_pilon_pilon-processed-gene-0.6-mRNA-1	1
maker-tulip_contig_192_pilon_pilon-augustus-gene-0.4-mRNA-1	1
augustus_masked-tulip_contig_82_pilon_pilon-processed-gene-1.15-mRNA-1	1
augustus_masked-tulip_contig_495_pilon_pilon-processed-gene-0.11-mRNA-1	1
maker-tulip_contig_531_pilon_pilon-augustus-gene-6.3-mRNA-1	1
maker-tulip_contig_668_pilon_pilon-augustus-gene-1.16-mRNA-1	1
augustus_masked-tulip_contig_584_pilon_pilon-processed-gene-3.89-mRNA-1	1
maker-tulip_contig_821_pilon_pilon-augustus-gene-0.10-mRNA-1	1
maker-tulip_contig_881_pilon_pilon-augustus-gene-1.47-mRNA-1	1
maker-tulip_contig_872_pilon_pilon-augustus-gene-0.80-mRNA-1	1
maker-tulip_contig_819_pilon_pilon-augustus-gene-0.38-mRNA-1	1
maker-tulip_contig_394_pilon_pilon-augustus-gene-2.9-mRNA-1	1
maker-tulip_contig_586_pilon_pilon-augustus-gene-4.56-mRNA-1	1
maker-tulip_contig_711_pilon_pilon-augustus-gene-1.26-mRNA-1	1
augustus_masked-tulip_contig_560_pilon_pilon-processed-gene-3.4-mRNA-1	1
maker-tulip_contig_885_pilon_pilon-augustus-gene-0.10-mRNA-1	1
augustus_masked-tulip_contig_732_pilon_pilon-processed-gene-4.6-mRNA-1	1
augustus_masked-tulip_contig_732_pilon_pilon-processed-gene-4.5-mRNA-1	1
augustus_masked-tulip_contig_274_pilon_pilon-processed-gene-2.1-mRNA-1	1
maker-tulip_contig_39_pilon_pilon-augustus-gene-1.212-mRNA-1	1
maker-tulip_contig_361_pilon_pilon-augustus-gene-1.77-mRNA-1	1
maker-tulip_contig_515_pilon_pilon-augustus-gene-3.28-mRNA-1	1
maker-tulip_contig_199_pilon_pilon-augustus-gene-3.43-mRNA-1	1
maker-tulip_contig_199_pilon_pilon-augustus-gene-3.42-mRNA-1	1
maker-tulip_contig_72_pilon_pilon-augustus-gene-0.51-mRNA-1	1
augustus_masked-tulip_contig_294_pilon_pilon-processed-gene-1.14-mRNA-1	1
maker-tulip_contig_190_pilon_pilon-augustus-gene-2.26-mRNA-1	1
maker-tulip_contig_441_pilon_pilon-augustus-gene-2.5-mRNA-1	1
maker-tulip_contig_827_pilon_pilon-augustus-gene-2.104-mRNA-1	1
augustus_masked-tulip_contig_34_pilon_pilon-processed-gene-0.14-mRNA-1	1
maker-tulip_contig_597_pilon_pilon-augustus-gene-4.35-mRNA-1	1
maker-tulip_contig_406_pilon_pilon-augustus-gene-0.44-mRNA-1	1
maker-tulip_contig_689_pilon_pilon-augustus-gene-3.11-mRNA-1	1
maker-tulip_contig_584_pilon_pilon-augustus-gene-3.34-mRNA-1	1
maker-tulip_contig_429_pilon_pilon-augustus-gene-0.32-mRNA-1	1
maker-tulip_contig_420_pilon_pilon-augustus-gene-2.73-mRNA-1	1
maker-tulip_contig_189_pilon_pilon-augustus-gene-0.52-mRNA-1	1
augustus_masked-tulip_contig_673_pilon_pilon-processed-gene-0.34-mRNA-1	1
augustus_masked-tulip_contig_3_pilon_pilon-processed-gene-0.54-mRNA-1	1
augustus_masked-tulip_contig_495_pilon_pilon-processed-gene-0.8-mRNA-1	1
maker-tulip_contig_800_pilon_pilon-augustus-gene-1.42-mRNA-1	1
maker-tulip_contig_473_pilon_pilon-augustus-gene-1.35-mRNA-1	1
maker-tulip_contig_58_pilon_pilon-augustus-gene-4.47-mRNA-1	1
maker-tulip_contig_704_pilon_pilon-augustus-gene-2.62-mRNA-1	1
maker-tulip_contig_362_pilon_pilon-augustus-gene-1.39-mRNA-1	1
augustus_masked-tulip_contig_37_pilon_pilon-processed-gene-1.20-mRNA-1	1
maker-tulip_contig_507_pilon_pilon-augustus-gene-2.72-mRNA-1	1
augustus_masked-tulip_contig_689_pilon_pilon-processed-gene-4.10-mRNA-1	1
augustus_masked-tulip_contig_450_pilon_pilon-processed-gene-1.19-mRNA-1	1
maker-tulip_contig_211_pilon_pilon-augustus-gene-4.45-mRNA-1	1
maker-tulip_contig_626_pilon_pilon-augustus-gene-1.54-mRNA-1	1
maker-tulip_contig_334_pilon_pilon-augustus-gene-2.2-mRNA-1	1
maker-tulip_contig_1_pilon_pilon-augustus-gene-4.8-mRNA-1	1
maker-tulip_contig_441_pilon_pilon-augustus-gene-6.8-mRNA-1	1
maker-tulip_contig_236_pilon_pilon-augustus-gene-3.12-mRNA-1	1
maker-tulip_contig_640_pilon_pilon-augustus-gene-2.18-mRNA-1	1
augustus_masked-tulip_contig_638_pilon_pilon-processed-gene-0.37-mRNA-1	1
augustus_masked-tulip_contig_221_pilon_pilon-processed-gene-0.5-mRNA-1	1
maker-tulip_contig_769_pilon_pilon-augustus-gene-0.6-mRNA-1	1
maker-tulip_contig_872_pilon_pilon-augustus-gene-0.150-mRNA-1	1
maker-tulip_contig_199_pilon_pilon-augustus-gene-4.29-mRNA-1	1
maker-tulip_contig_327_pilon_pilon-augustus-gene-0.13-mRNA-1	1
maker-tulip_contig_34_pilon_pilon-augustus-gene-0.125-mRNA-1	1
maker-tulip_contig_82_pilon_pilon-augustus-gene-1.34-mRNA-1	1
maker-tulip_contig_121_pilon_pilon-augustus-gene-1.12-mRNA-1	1
maker-tulip_contig_605_pilon_pilon-augustus-gene-0.33-mRNA-1	1
maker-tulip_contig_182_pilon_pilon-augustus-gene-1.63-mRNA-1	1
maker-tulip_contig_307_pilon_pilon-augustus-gene-1.148-mRNA-1	1
maker-tulip_contig_740_pilon_pilon-augustus-gene-0.17-mRNA-1	1
maker-tulip_contig_872_pilon_pilon-augustus-gene-0.84-mRNA-1	1
augustus_masked-tulip_contig_566_pilon_pilon-processed-gene-2.43-mRNA-1	1
maker-tulip_contig_662_pilon_pilon-augustus-gene-2.44-mRNA-1	1
maker-tulip_contig_123_pilon_pilon-augustus-gene-0.7-mRNA-1	1
maker-tulip_contig_123_pilon_pilon-augustus-gene-0.8-mRNA-1	1
augustus_masked-tulip_contig_121_pilon_pilon-processed-gene-3.36-mRNA-1	1
augustus_masked-tulip_contig_576_pilon_pilon-processed-gene-0.16-mRNA-1	1
maker-tulip_contig_623_pilon_pilon-augustus-gene-4.41-mRNA-1	1
maker-tulip_contig_662_pilon_pilon-augustus-gene-2.36-mRNA-1	1
maker-tulip_contig_584_pilon_pilon-augustus-gene-1.11-mRNA-1	1
augustus_masked-tulip_contig_645_pilon_pilon-processed-gene-2.35-mRNA-1	1
maker-tulip_contig_187_pilon_pilon-augustus-gene-1.35-mRNA-1	1
augustus_masked-tulip_contig_483_pilon_pilon-processed-gene-0.14-mRNA-1	1
augustus_masked-tulip_contig_506_pilon_pilon-processed-gene-1.8-mRNA-1	1
maker-tulip_contig_47_pilon_pilon-augustus-gene-0.24-mRNA-1	1
maker-tulip_contig_619_pilon_pilon-augustus-gene-1.4-mRNA-1	1
maker-tulip_contig_407_pilon_pilon-augustus-gene-7.95-mRNA-1	1
maker-tulip_contig_450_pilon_pilon-augustus-gene-0.11-mRNA-1	1
maker-tulip_contig_781_pilon_pilon-augustus-gene-4.9-mRNA-1	1
maker-tulip_contig_334_pilon_pilon-augustus-gene-2.34-mRNA-1	1
maker-tulip_contig_251_pilon_pilon-augustus-gene-0.0-mRNA-1	1
augustus_masked-tulip_contig_690_pilon_pilon-processed-gene-5.16-mRNA-1	1
augustus_masked-tulip_contig_307_pilon_pilon-processed-gene-0.35-mRNA-1	1
maker-tulip_contig_216_pilon_pilon-augustus-gene-0.47-mRNA-1	1
maker-tulip_contig_18_pilon_pilon-augustus-gene-0.12-mRNA-1	1
maker-tulip_contig_584_pilon_pilon-augustus-gene-0.12-mRNA-1	1
maker-tulip_contig_715_pilon_pilon-augustus-gene-4.38-mRNA-1	1
maker-tulip_contig_168_pilon_pilon-augustus-gene-0.35-mRNA-1	1
maker-tulip_contig_280_pilon_pilon-augustus-gene-1.90-mRNA-1	1
maker-tulip_contig_674_pilon_pilon-augustus-gene-1.48-mRNA-1	1
augustus_masked-tulip_contig_809_pilon_pilon-processed-gene-2.0-mRNA-1	1
maker-tulip_contig_476_pilon_pilon-augustus-gene-0.2-mRNA-1	1
maker-tulip_contig_529_pilon_pilon-augustus-gene-1.10-mRNA-1	1
augustus_masked-tulip_contig_566_pilon_pilon-processed-gene-2.32-mRNA-1	1
maker-tulip_contig_407_pilon_pilon-augustus-gene-8.49-mRNA-1	1
maker-tulip_contig_514_pilon_pilon-augustus-gene-0.16-mRNA-1	1
maker-tulip_contig_441_pilon_pilon-augustus-gene-2.4-mRNA-1	1
maker-tulip_contig_693_pilon_pilon-augustus-gene-2.43-mRNA-1	1
maker-tulip_contig_714_pilon_pilon-augustus-gene-0.72-mRNA-1	1
maker-tulip_contig_31_pilon_pilon-augustus-gene-1.70-mRNA-1	1
maker-tulip_contig_196_pilon_pilon-augustus-gene-0.7-mRNA-1	1
augustus_masked-tulip_contig_474_pilon_pilon-processed-gene-6.64-mRNA-1	1
maker-tulip_contig_689_pilon_pilon-augustus-gene-1.32-mRNA-1	1
maker-tulip_contig_571_pilon_pilon-augustus-gene-0.20-mRNA-1	1
maker-tulip_contig_204_pilon_pilon-augustus-gene-1.18-mRNA-1	1
maker-tulip_contig_217_pilon_pilon-augustus-gene-4.3-mRNA-1	1
maker-tulip_contig_690_pilon_pilon-augustus-gene-4.25-mRNA-1	1
maker-tulip_contig_54_pilon_pilon-augustus-gene-2.39-mRNA-1	1
maker-tulip_contig_715_pilon_pilon-augustus-gene-3.12-mRNA-1	1
augustus_masked-tulip_contig_689_pilon_pilon-processed-gene-3.1-mRNA-1	1
maker-tulip_contig_689_pilon_pilon-augustus-gene-0.12-mRNA-1	1
maker-tulip_contig_581_pilon_pilon-augustus-gene-4.20-mRNA-1	1
augustus_masked-tulip_contig_659_pilon_pilon-processed-gene-0.3-mRNA-1	1
augustus_masked-tulip_contig_77_pilon_pilon-processed-gene-1.3-mRNA-1	1
maker-tulip_contig_270_pilon_pilon-augustus-gene-3.86-mRNA-1	1
maker-tulip_contig_368_pilon_pilon-augustus-gene-0.60-mRNA-1	1
augustus_masked-tulip_contig_818_pilon_pilon-processed-gene-0.6-mRNA-1	1
maker-tulip_contig_476_pilon_pilon-augustus-gene-0.20-mRNA-1	1
augustus_masked-tulip_contig_345_pilon_pilon-processed-gene-4.14-mRNA-1	1
augustus_masked-tulip_contig_434_pilon_pilon-processed-gene-0.36-mRNA-1	1
maker-tulip_contig_625_pilon_pilon-augustus-gene-0.30-mRNA-1	1
augustus_masked-tulip_contig_270_pilon_pilon-processed-gene-3.203-mRNA-1	1
maker-tulip_contig_597_pilon_pilon-augustus-gene-3.37-mRNA-1	1
maker-tulip_contig_1_pilon_pilon-augustus-gene-5.22-mRNA-1	1
maker-tulip_contig_327_pilon_pilon-augustus-gene-7.42-mRNA-1	1
maker-tulip_contig_212_pilon_pilon-augustus-gene-1.90-mRNA-1	1
maker-tulip_contig_1_pilon_pilon-augustus-gene-1.25-mRNA-1	1
maker-tulip_contig_651_pilon_pilon-augustus-gene-0.49-mRNA-1	1
augustus_masked-tulip_contig_272_pilon_pilon-processed-gene-4.84-mRNA-1	1
maker-tulip_contig_812_pilon_pilon-augustus-gene-1.15-mRNA-1	1
maker-tulip_contig_59_pilon_pilon-augustus-gene-1.97-mRNA-1	1
augustus_masked-tulip_contig_787_pilon_pilon-processed-gene-0.4-mRNA-1	1
maker-tulip_contig_307_pilon_pilon-augustus-gene-0.0-mRNA-1	1
maker-tulip_contig_220_pilon_pilon-augustus-gene-0.22-mRNA-1	1
augustus_masked-tulip_contig_495_pilon_pilon-processed-gene-0.7-mRNA-1	1
augustus_masked-tulip_contig_334_pilon_pilon-processed-gene-2.66-mRNA-1	1
augustus_masked-tulip_contig_245_pilon_pilon-processed-gene-0.1-mRNA-1	1
augustus_masked-tulip_contig_15_pilon_pilon-processed-gene-0.13-mRNA-1	1
augustus_masked-tulip_contig_234_pilon_pilon-processed-gene-0.30-mRNA-1	1
maker-tulip_contig_581_pilon_pilon-augustus-gene-2.24-mRNA-1	1
maker-tulip_contig_145_pilon_pilon-augustus-gene-6.10-mRNA-1	1
augustus_masked-tulip_contig_168_pilon_pilon-processed-gene-0.102-mRNA-1	1
augustus_masked-tulip_contig_72_pilon_pilon-processed-gene-0.18-mRNA-1	1
maker-tulip_contig_99_pilon_pilon-augustus-gene-0.12-mRNA-1	1
augustus_masked-tulip_contig_539_pilon_pilon-processed-gene-0.1-mRNA-1	1
maker-tulip_contig_61_pilon_pilon-augustus-gene-0.16-mRNA-1	1
maker-tulip_contig_620_pilon_pilon-augustus-gene-1.17-mRNA-1	1
maker-tulip_contig_690_pilon_pilon-augustus-gene-3.40-mRNA-1	1
maker-tulip_contig_515_pilon_pilon-augustus-gene-2.15-mRNA-1	1
maker-tulip_contig_54_pilon_pilon-augustus-gene-0.15-mRNA-1	1
maker-tulip_contig_307_pilon_pilon-augustus-gene-1.100-mRNA-1	1
augustus_masked-tulip_contig_616_pilon_pilon-processed-gene-1.11-mRNA-1	1
maker-tulip_contig_287_pilon_pilon-augustus-gene-1.129-mRNA-1	1
maker-tulip_contig_283_pilon_pilon-augustus-gene-2.16-mRNA-1	1
maker-tulip_contig_503_pilon_pilon-augustus-gene-1.5-mRNA-1	1
maker-tulip_contig_498_pilon_pilon-augustus-gene-0.1-mRNA-1	1
maker-tulip_contig_831_pilon_pilon-augustus-gene-0.49-mRNA-1	1
augustus_masked-tulip_contig_391_pilon_pilon-processed-gene-0.1-mRNA-1	1
maker-tulip_contig_70_pilon_pilon-augustus-gene-0.48-mRNA-1	1
maker-tulip_contig_691_pilon_pilon-augustus-gene-4.32-mRNA-1	1
maker-tulip_contig_362_pilon_pilon-augustus-gene-0.26-mRNA-1	1
maker-tulip_contig_571_pilon_pilon-augustus-gene-0.24-mRNA-1	1
maker-tulip_contig_691_pilon_pilon-augustus-gene-1.13-mRNA-1	1
maker-tulip_contig_103_pilon_pilon-augustus-gene-0.23-mRNA-1	1
augustus_masked-tulip_contig_495_pilon_pilon-processed-gene-0.20-mRNA-1	1
augustus_masked-tulip_contig_583_pilon_pilon-processed-gene-1.36-mRNA-1	1
augustus_masked-tulip_contig_698_pilon_pilon-processed-gene-1.8-mRNA-1	1
augustus_masked-tulip_contig_76_pilon_pilon-processed-gene-1.22-mRNA-1	1
augustus_masked-tulip_contig_632_pilon_pilon-processed-gene-3.17-mRNA-1	1
maker-tulip_contig_855_pilon_pilon-augustus-gene-2.13-mRNA-1	1
maker-tulip_contig_280_pilon_pilon-augustus-gene-1.74-mRNA-1	1
maker-tulip_contig_280_pilon_pilon-augustus-gene-1.75-mRNA-1	1
maker-tulip_contig_748_pilon_pilon-augustus-gene-1.26-mRNA-1	1
maker-tulip_contig_260_pilon_pilon-augustus-gene-0.30-mRNA-1	1
maker-tulip_contig_199_pilon_pilon-augustus-gene-5.20-mRNA-1	1
maker-tulip_contig_247_pilon_pilon-augustus-gene-2.105-mRNA-1	1
maker-tulip_contig_43_pilon_pilon-augustus-gene-6.43-mRNA-1	1
augustus_masked-tulip_contig_691_pilon_pilon-processed-gene-2.20-mRNA-1	1
maker-tulip_contig_664_pilon_pilon-augustus-gene-0.9-mRNA-1	1
augustus_masked-tulip_contig_208_pilon_pilon-processed-gene-1.39-mRNA-1	1
maker-tulip_contig_620_pilon_pilon-augustus-gene-3.2-mRNA-1	1
augustus_masked-tulip_contig_407_pilon_pilon-processed-gene-3.60-mRNA-1	1
augustus_masked-tulip_contig_698_pilon_pilon-processed-gene-0.4-mRNA-1	1
augustus_masked-tulip_contig_15_pilon_pilon-processed-gene-0.12-mRNA-1	1
maker-tulip_contig_362_pilon_pilon-augustus-gene-9.3-mRNA-1	1
augustus_masked-tulip_contig_474_pilon_pilon-processed-gene-5.20-mRNA-1	1
maker-tulip_contig_168_pilon_pilon-augustus-gene-0.22-mRNA-1	1
augustus_masked-tulip_contig_66_pilon_pilon-processed-gene-3.6-mRNA-1	1
augustus_masked-tulip_contig_450_pilon_pilon-processed-gene-1.10-mRNA-1	1
augustus_masked-tulip_contig_323_pilon_pilon-processed-gene-2.36-mRNA-1	1
augustus_masked-tulip_contig_196_pilon_pilon-processed-gene-1.21-mRNA-1	1
maker-tulip_contig_837_pilon_pilon-augustus-gene-9.46-mRNA-1	1
augustus_masked-tulip_contig_280_pilon_pilon-processed-gene-1.13-mRNA-1	1
augustus_masked-tulip_contig_35_pilon_pilon-processed-gene-0.158-mRNA-1	1
maker-tulip_contig_21_pilon_pilon-augustus-gene-0.13-mRNA-1	1
augustus_masked-tulip_contig_468_pilon_pilon-processed-gene-0.3-mRNA-1	1
maker-tulip_contig_604_pilon_pilon-augustus-gene-3.62-mRNA-1	1
maker-tulip_contig_515_pilon_pilon-augustus-gene-6.8-mRNA-1	1
maker-tulip_contig_4_pilon_pilon-augustus-gene-1.7-mRNA-1	1
augustus_masked-tulip_contig_318_pilon_pilon-processed-gene-0.72-mRNA-1	1
maker-tulip_contig_351_pilon_pilon-augustus-gene-1.68-mRNA-1	1
augustus_masked-tulip_contig_671_pilon_pilon-processed-gene-0.35-mRNA-1	1
maker-tulip_contig_597_pilon_pilon-augustus-gene-5.0-mRNA-1	1
maker-tulip_contig_147_pilon_pilon-augustus-gene-1.58-mRNA-1	1
maker-tulip_contig_508_pilon_pilon-augustus-gene-1.33-mRNA-1	1
maker-tulip_contig_807_pilon_pilon-augustus-gene-3.31-mRNA-1	1
maker-tulip_contig_609_pilon_pilon-augustus-gene-0.20-mRNA-1	1
maker-tulip_contig_72_pilon_pilon-augustus-gene-0.54-mRNA-1	1
augustus_masked-tulip_contig_597_pilon_pilon-processed-gene-5.47-mRNA-1	1
augustus_masked-tulip_contig_15_pilon_pilon-processed-gene-2.9-mRNA-1	1
augustus_masked-tulip_contig_15_pilon_pilon-processed-gene-2.8-mRNA-1	1
augustus_masked-tulip_contig_424_pilon_pilon-processed-gene-2.125-mRNA-1	1
augustus_masked-tulip_contig_147_pilon_pilon-processed-gene-1.79-mRNA-1	1
maker-tulip_contig_238_pilon_pilon-augustus-gene-0.53-mRNA-1	1
augustus_masked-tulip_contig_4_pilon_pilon-processed-gene-0.26-mRNA-1	1
maker-tulip_contig_597_pilon_pilon-augustus-gene-3.30-mRNA-1	1
augustus_masked-tulip_contig_715_pilon_pilon-processed-gene-5.18-mRNA-1	1
maker-tulip_contig_860_pilon_pilon-augustus-gene-6.2-mRNA-1	1
maker-tulip_contig_320_pilon_pilon-augustus-gene-1.6-mRNA-1	1
maker-tulip_contig_20_pilon_pilon-augustus-gene-0.25-mRNA-1	1
augustus_masked-tulip_contig_110_pilon_pilon-processed-gene-3.9-mRNA-1	1
maker-tulip_contig_407_pilon_pilon-augustus-gene-9.157-mRNA-1	1
maker-tulip_contig_831_pilon_pilon-augustus-gene-1.1-mRNA-1	1
maker-tulip_contig_628_pilon_pilon-augustus-gene-4.64-mRNA-1	1
maker-tulip_contig_493_pilon_pilon-augustus-gene-1.15-mRNA-1	1
maker-tulip_contig_837_pilon_pilon-augustus-gene-9.40-mRNA-1	1
maker-tulip_contig_59_pilon_pilon-augustus-gene-1.96-mRNA-1	1
maker-tulip_contig_178_pilon_pilon-augustus-gene-0.52-mRNA-1	1
augustus_masked-tulip_contig_22_pilon_pilon-processed-gene-0.28-mRNA-1	1
maker-tulip_contig_490_pilon_pilon-augustus-gene-1.25-mRNA-1	1
augustus_masked-tulip_contig_327_pilon_pilon-processed-gene-10.7-mRNA-1	1
augustus_masked-tulip_contig_85_pilon_pilon-processed-gene-2.44-mRNA-1	1
maker-tulip_contig_507_pilon_pilon-augustus-gene-0.41-mRNA-1	1
maker-tulip_contig_362_pilon_pilon-augustus-gene-5.0-mRNA-1	1
maker-tulip_contig_33_pilon_pilon-augustus-gene-5.2-mRNA-1	1
maker-tulip_contig_482_pilon_pilon-augustus-gene-3.26-mRNA-1	1
augustus_masked-tulip_contig_821_pilon_pilon-processed-gene-0.22-mRNA-1	1
maker-tulip_contig_806_pilon_pilon-augustus-gene-1.12-mRNA-1	1
maker-tulip_contig_740_pilon_pilon-augustus-gene-1.4-mRNA-1	1
augustus_masked-tulip_contig_109_pilon_pilon-processed-gene-1.70-mRNA-1	1
maker-tulip_contig_627_pilon_pilon-augustus-gene-0.29-mRNA-1	1
augustus_masked-tulip_contig_187_pilon_pilon-processed-gene-2.1-mRNA-1	1
maker-tulip_contig_531_pilon_pilon-augustus-gene-0.54-mRNA-1	1
maker-tulip_contig_531_pilon_pilon-augustus-gene-3.25-mRNA-1	1
maker-tulip_contig_6_pilon_pilon-augustus-gene-0.6-mRNA-1	1
maker-tulip_contig_837_pilon_pilon-augustus-gene-0.2-mRNA-1	1
augustus_masked-tulip_contig_281_pilon_pilon-processed-gene-3.51-mRNA-1	1
maker-tulip_contig_778_pilon_pilon-augustus-gene-0.26-mRNA-1	1
maker-tulip_contig_916_pilon_pilon-augustus-gene-0.0-mRNA-1	1
maker-tulip_contig_593_pilon_pilon-augustus-gene-0.7-mRNA-1	1
maker-tulip_contig_351_pilon_pilon-augustus-gene-1.46-mRNA-1	1
maker-tulip_contig_767_pilon_pilon-augustus-gene-0.32-mRNA-1	1
augustus_masked-tulip_contig_274_pilon_pilon-processed-gene-0.6-mRNA-1	1
maker-tulip_contig_387_pilon_pilon-augustus-gene-1.94-mRNA-1	1
maker-tulip_contig_448_pilon_pilon-augustus-gene-2.21-mRNA-1	1
maker-tulip_contig_396_pilon_pilon-augustus-gene-0.33-mRNA-1	1
augustus_masked-tulip_contig_586_pilon_pilon-processed-gene-10.3-mRNA-1	1
maker-tulip_contig_690_pilon_pilon-augustus-gene-1.19-mRNA-1	1
maker-tulip_contig_323_pilon_pilon-augustus-gene-1.1-mRNA-1	1
augustus_masked-tulip_contig_333_pilon_pilon-processed-gene-3.2-mRNA-1	1
maker-tulip_contig_76_pilon_pilon-augustus-gene-0.7-mRNA-1	1
augustus_masked-tulip_contig_323_pilon_pilon-processed-gene-1.37-mRNA-1	1
maker-tulip_contig_81_pilon_pilon-augustus-gene-2.16-mRNA-1	1
augustus_masked-tulip_contig_81_pilon_pilon-processed-gene-1.37-mRNA-1	1
maker-tulip_contig_137_pilon_pilon-augustus-gene-0.26-mRNA-1	1
maker-tulip_contig_252_pilon_pilon-augustus-gene-0.25-mRNA-1	1
augustus_masked-tulip_contig_843_pilon_pilon-processed-gene-1.3-mRNA-1	1
maker-tulip_contig_69_pilon_pilon-augustus-gene-1.0-mRNA-1	1
augustus_masked-tulip_contig_247_pilon_pilon-processed-gene-2.174-mRNA-1	1
maker-tulip_contig_275_pilon_pilon-augustus-gene-0.13-mRNA-1	1
augustus_masked-tulip_contig_838_pilon_pilon-processed-gene-0.9-mRNA-1	1
maker-tulip_contig_4_pilon_pilon-augustus-gene-0.0-mRNA-1	1
maker-tulip_contig_338_pilon_pilon-augustus-gene-1.12-mRNA-1	1
augustus_masked-tulip_contig_362_pilon_pilon-processed-gene-9.6-mRNA-1	1
maker-tulip_contig_185_pilon_pilon-augustus-gene-0.16-mRNA-1	1
augustus_masked-tulip_contig_827_pilon_pilon-processed-gene-0.14-mRNA-1	1
augustus_masked-tulip_contig_194_pilon_pilon-processed-gene-2.1-mRNA-1	1
maker-tulip_contig_860_pilon_pilon-augustus-gene-0.14-mRNA-1	1
augustus_masked-tulip_contig_182_pilon_pilon-processed-gene-1.6-mRNA-1	1
maker-tulip_contig_128_pilon_pilon-augustus-gene-0.9-mRNA-1	1
maker-tulip_contig_632_pilon_pilon-augustus-gene-3.20-mRNA-1	1
augustus_masked-tulip_contig_307_pilon_pilon-processed-gene-1.8-mRNA-1	1
maker-tulip_contig_523_pilon_pilon-augustus-gene-0.114-mRNA-1	1
augustus_masked-tulip_contig_716_pilon_pilon-processed-gene-1.14-mRNA-1	1
maker-tulip_contig_145_pilon_pilon-augustus-gene-5.37-mRNA-1	1
augustus_masked-tulip_contig_691_pilon_pilon-processed-gene-0.59-mRNA-1	1
maker-tulip_contig_490_pilon_pilon-augustus-gene-1.27-mRNA-1	1
augustus_masked-tulip_contig_597_pilon_pilon-processed-gene-5.54-mRNA-1	1
maker-tulip_contig_362_pilon_pilon-augustus-gene-3.50-mRNA-1	1
maker-tulip_contig_732_pilon_pilon-augustus-gene-6.0-mRNA-1	1
augustus_masked-tulip_contig_441_pilon_pilon-processed-gene-4.1-mRNA-1	1
maker-tulip_contig_463_pilon_pilon-augustus-gene-0.24-mRNA-1	1
maker-tulip_contig_73_pilon_pilon-augustus-gene-0.116-mRNA-1	1
augustus_masked-tulip_contig_837_pilon_pilon-processed-gene-7.66-mRNA-1	1
maker-tulip_contig_867_pilon_pilon-augustus-gene-0.14-mRNA-1	1
augustus_masked-tulip_contig_523_pilon_pilon-processed-gene-0.49-mRNA-1	1
augustus_masked-tulip_contig_523_pilon_pilon-processed-gene-0.43-mRNA-1	1
maker-tulip_contig_252_pilon_pilon-augustus-gene-1.9-mRNA-1	1
maker-tulip_contig_702_pilon_pilon-augustus-gene-0.82-mRNA-1	1
augustus_masked-tulip_contig_777_pilon_pilon-processed-gene-0.25-mRNA-1	1
maker-tulip_contig_167_pilon_pilon-augustus-gene-0.56-mRNA-1	1
augustus_masked-tulip_contig_290_pilon_pilon-processed-gene-3.51-mRNA-1	1
maker-tulip_contig_190_pilon_pilon-augustus-gene-0.22-mRNA-1	1
maker-tulip_contig_307_pilon_pilon-augustus-gene-1.176-mRNA-1	1
augustus_masked-tulip_contig_334_pilon_pilon-processed-gene-2.68-mRNA-1	1
augustus_masked-tulip_contig_495_pilon_pilon-processed-gene-0.9-mRNA-1	1
maker-tulip_contig_931_pilon_pilon-augustus-gene-1.47-mRNA-1	1
maker-tulip_contig_305_pilon_pilon-augustus-gene-0.4-mRNA-1	1
maker-tulip_contig_781_pilon_pilon-augustus-gene-5.26-mRNA-1	1
maker-tulip_contig_745_pilon_pilon-augustus-gene-0.18-mRNA-1	1
augustus_masked-tulip_contig_309_pilon_pilon-processed-gene-0.87-mRNA-1	1
maker-tulip_contig_204_pilon_pilon-augustus-gene-1.17-mRNA-1	1
maker-tulip_contig_947_pilon_pilon-augustus-gene-0.0-mRNA-1	1
augustus_masked-tulip_contig_254_pilon_pilon-processed-gene-0.37-mRNA-1	1
maker-tulip_contig_109_pilon_pilon-augustus-gene-1.14-mRNA-1	1
maker-tulip_contig_690_pilon_pilon-augustus-gene-4.94-mRNA-1	1
maker-tulip_contig_372_pilon_pilon-augustus-gene-1.21-mRNA-1	1
maker-tulip_contig_272_pilon_pilon-augustus-gene-2.4-mRNA-1	1
maker-tulip_contig_333_pilon_pilon-augustus-gene-1.42-mRNA-1	1
maker-tulip_contig_674_pilon_pilon-augustus-gene-3.15-mRNA-1	1
maker-tulip_contig_905_pilon_pilon-augustus-gene-0.58-mRNA-1	1
maker-tulip_contig_284_pilon_pilon-augustus-gene-2.29-mRNA-1	1
augustus_masked-tulip_contig_407_pilon_pilon-processed-gene-2.73-mRNA-1	1
maker-tulip_contig_777_pilon_pilon-augustus-gene-0.70-mRNA-1	1
augustus_masked-tulip_contig_661_pilon_pilon-processed-gene-1.51-mRNA-1	1
maker-tulip_contig_149_pilon_pilon-augustus-gene-0.16-mRNA-1	1
augustus_masked-tulip_contig_674_pilon_pilon-processed-gene-7.59-mRNA-1	1
maker-tulip_contig_252_pilon_pilon-augustus-gene-0.21-mRNA-1	1
maker-tulip_contig_85_pilon_pilon-augustus-gene-2.20-mRNA-1	1
maker-tulip_contig_121_pilon_pilon-augustus-gene-4.51-mRNA-1	1
augustus_masked-tulip_contig_252_pilon_pilon-processed-gene-1.26-mRNA-1	1
augustus_masked-tulip_contig_773_pilon_pilon-processed-gene-0.1-mRNA-1	1
maker-tulip_contig_89_pilon_pilon-augustus-gene-0.18-mRNA-1	1
augustus_masked-tulip_contig_317_pilon_pilon-processed-gene-1.90-mRNA-1	1
augustus_masked-tulip_contig_674_pilon_pilon-processed-gene-11.2-mRNA-1	1
[truncated: 7,898 more rows]
